# Supplementary material for: Diving into Diversity: Copepod Crustaceans in Octocoral Associations
Source: MDPI journal article supplement (doi:10.3390/d15111140), 2023-11-14
Supplement: s1 [file s1]

# Diving into Diversity: Copepod Crustaceans in Octocoral Associations

Oksana A. Korzhavina <sup>1</sup>, Darya Y. Grishina <sup>1</sup>, Xingru Chen <sup>2</sup>, Diego Fontaneto <sup>3</sup> and Viatcheslav N. Ivanenko <sup>1,2\*</sup>

<sup>1</sup> Department of Invertebrate Zoology, Biological Faculty, Lomonosov Moscow State University, Leninskie Gory, GSP-1, Moscow, 119991, Russia; korzhavina@mail.bio.msu.ru (O.A.K.), daria.grishina@student.msu.ru (D.Y.G.)

<sup>2</sup> Faculty of Biology, Shenzhen MSU-BIT University, Shenzhen, 518115, China; 965378695@qq.com (X.C.)

<sup>3</sup> Water Research Institute (IRSA), National Research Council of Italy (CNR), Largo Tonolli 50, Verbania Pallanza, 28922, Italy; diego.fontaneto@cnr.it (D.F.)

\* Correspondence: ivanenko.slava@gmail.com

**Table S1.** Octocorals as hosts of copepod crustaceans.

| Octocoral Host (valid name and as indicated in the original record) | Copepod species name                              | Copepod family abbreviation * | Site abbreviation ** | Depth (m)            | Reference                       |
|---------------------------------------------------------------------|---------------------------------------------------|-------------------------------|----------------------|----------------------|---------------------------------|
| <b>Alcyonacea</b>                                                   |                                                   |                               |                      |                      |                                 |
| <b>Acanthogorgiidae</b>                                             |                                                   |                               |                      |                      |                                 |
| <i>Acanthogorgia aspera</i> Pourtalès, 1867                         | <i>Acanthomolgus astrictus</i> Humes, Stock, 1973 | Rhy                           | MG                   | 4; 8; 20; 23; 24; 40 | Humes, Stock, 1973; Humes, 1974 |
| <i>Acanthogorgia</i> sp.                                            | <i>Acanthomolgus astrictus</i> Humes, Stock, 1973 | Rhy                           | ID                   | 25                   | Humes, 1993                     |
| <i>Acanthogorgia</i> sp.                                            | <i>Orecturus finitimus</i> Humes, 1993            | Ast                           | ID                   | 17; 25               | Humes, 1993                     |
| <i>Acanthogorgia</i> sp.                                            | <i>Orecturus grandisetiger</i> Humes, 1992        | Ast                           | ID                   | 17; 25               | Humes, 1993                     |
| <i>Anthogorgia</i> sp.                                              | <i>Acanthomolgus astrictus</i> Humes, Stock, 1973 | Rhy                           | ID                   | 10                   | Humes, 1993                     |
| <i>Calicogorgia granulosa</i> Kükenthal, Gorzawsky, 1908            | <i>Orecturus longicaudatus</i> Kim, Song, 2003    | Ast                           | KR                   | 10                   | Kim, Song, 2003                 |
| <i>Muricella rubra robusta</i> Thomson & Simpson                    | <i>Acanthomolgus astrictus</i> Humes, Stock, 1973 | Rhy                           | MG                   | 10; 15               | Humes, 1974                     |

|                                                                                                    |                                                                                                       |     |            |            |                                                     |
|----------------------------------------------------------------------------------------------------|-------------------------------------------------------------------------------------------------------|-----|------------|------------|-----------------------------------------------------|
| <i>Muricella</i> sp.                                                                               | <i>Acanthomolgus astrictus</i> Humes, Stock, 1973                                                     | Rhy | ID; PH     | 10; 40     | Humes, 1993                                         |
| <i>Muricella</i> sp.                                                                               | <i>Enalcyonium circulatum</i> Kim, 2007                                                               | Lam | ID         | 2          | Kim, 2007                                           |
| <b>Alcyoniidae</b>                                                                                 |                                                                                                       |     |            |            |                                                     |
| <i>Alcyonium acaule</i> Marion, 1878                                                               | <i>Critomolgus bulbipes</i> (Stock, Kleeton, 1963)                                                    | Rhy | FR         | 10; 12     | Stock, Kleeton, 1963a                               |
| <i>Alcyonium acaule</i> Marion, 1878                                                               | <i>Enalcyonium confusum</i> Stock, 1988                                                               | Lam | FR         | 10         | Stock, 1988                                         |
| <i>Alcyonium acaule</i> Marion, 1878                                                               | <i>Enalcyonium rubicundum</i> Olsson, 1869                                                            | Lam | FR         | 40; 200    | Bouligand, 1960b                                    |
| <i>Alcyonium coralloides</i> (Pallas, 1766)                                                        | <i>Critomolgus bulbipes</i> (Stock, Kleeton, 1963)                                                    | Rhy | ES; FR     | 20; 23; 26 | Stock, Kleeton, 1963a                               |
| <i>Alcyonium coralloides</i> (Pallas, 1766)                                                        | <i>Enalcyonium setigerum</i> (Zulueta, 1908) (= <i>Lamippe setigera</i> Zulueta, 1908)                | Lam | FR         |            | Zulueta, 1908                                       |
| <i>Alcyonium coralloides</i> (Pallas, 1766) (= <i>Parerythropodium coralloides</i> (Pallas, 1766)) | <i>Lamippella faurei</i> Bouligand, Delamare Deboutteville, 1959                                      | Lam | FR         | 0; 2,2     | Bouligand, Delamare Deboutteville, 1959b            |
| <i>Alcyonium coralloides</i> (Pallas, 1766) (= <i>Parerythropodium coralloides</i> (Pallas, 1766)) | <i>Lamippina aciculifera</i> (Zulueta, 1908)                                                          | Lam |            |            | Bouligand, Delamare Deboutteville, 1959b            |
| <i>Alcyonium coralloides</i> (Pallas, 1766)                                                        | <i>Lamippina aciculifera</i> (Zulueta, 1908) (= <i>Lamippe brementi</i> Zulueta, 1910)                | Lam | FR         |            | Zulueta, 1910                                       |
| <i>Alcyonium digitatum</i> Linnaeus, 1758                                                          | <i>Acontiophorus armatus</i> Brady, 1880                                                              | Ast | IE         | 10         | Holmes, 1996                                        |
| <i>Alcyonium digitatum</i> Linnaeus, 1758                                                          | <i>Enalcyonium forbesi</i> (T. Scott, 1901)                                                           | Lam | FR; GB; IE | 20         | Scott, 1896; Scott, 1901; Stock, 1988; Holmes, 1996 |
| <i>Alcyonium digitatum</i> Linnaeus, 1758                                                          | <i>Enalcyonium olssoni</i> (Zulueta, 1908)                                                            | Lam | SE         |            | Olsson, 1869                                        |
| <i>Alcyonium digitatum</i> Linnaeus, 1758                                                          | <i>Enalcyonium rubicundum</i> Olsson, 1869 (= <i>Alcyonicola fusiformis</i> Scott T., Scott A., 1895) | Lam | GB; SE     |            | Scott, Scott, 1895; Olsson, 1869; Scott, 1896       |
| <i>Alcyonium digitatum</i> Linnaeus, 1758                                                          | <i>Lamippe proteus</i> Claparède, 1867                                                                | Lam | GB; IT     |            | Claparede, 1867; Scott, 1901                        |
| <i>Alcyonium palmatum</i> Pallas, 1766                                                             | <i>Enalcyonium confusum</i> Stock, 1988                                                               | Lam | FR         | 60; 80     | Stock, 1988                                         |
| <i>Alcyonium palmatum</i> Pallas, 1766                                                             | <i>Enalcyonium rubicundum</i> Olsson, 1869 (= <i>Lamippe rubicunda</i> (Olsson, 1869))                | Lam | FR         |            | Zulueta, 1908                                       |
| <i>Alcyonium palmatum</i> Pallas, 1766                                                             | <i>Lamippella faurei</i> Bouligand, Delamare Deboutteville, 1959                                      | Lam | FR         | 0; 2,2     | Bouligand, Delamare Deboutteville, 1959b            |

|                                                     |                                                                                                            |     |    |           |                                                                                     |
|-----------------------------------------------------|------------------------------------------------------------------------------------------------------------|-----|----|-----------|-------------------------------------------------------------------------------------|
| <i>Alcyonium palmatum</i> Pallas, 1766              | <i>Lamippina aciculifera</i> (Zulueta, 1908)                                                               | Lam | FR |           | Zulueta, 1908;<br>Bouligand, Delamare<br>Deboutteville, 1959b<br>Humes, Stock, 1973 |
| <i>Alcyonium</i> sp.                                | <i>Doridicola singularipes</i> (Humes, Ho, 1968)<br>(= <i>Metaxymolgus singularipes</i> (Humes, Ho, 1968)) | Rhy | MG | 1         |                                                                                     |
| <i>Alcyonium</i> sp.                                | <i>Enalcyonium olssoni</i> (Zulueta, 1908)                                                                 | Lam | SE |           | Bresciani, Lutzen, 1962                                                             |
| <i>Alcyonium</i> sp.                                | <i>Enalcyonium rubicundum</i> Olsson, 1869                                                                 | Lam | SE |           | Bresciani, Lutzen, 1962                                                             |
| <i>Alcyonium</i> sp.                                | <i>Lamippe proteus</i> Claparède, 1867                                                                     | Lam | GB |           | Scott, 1901                                                                         |
| <i>Bellonella rigida</i> Putter, 1900               | <i>Enalcyonium digitigerum</i> Ho, 1984                                                                    | Lam | JP |           | Ho, 1984                                                                            |
| <i>Cladiella humesi</i> Verseveldt, 1974            | <i>Critomolgus antennulus</i> Humes, 1990                                                                  | Rhy | NC | 2         | Kim, 2003                                                                           |
| <i>Cladiella humesi</i> Verseveldt, 1974            | <i>Critomolgus cladiellae</i> Humes, 1990                                                                  | Rhy | NC | 2         | Kim, 2003                                                                           |
| <i>Cladiella humesi</i> Verseveldt, 1974            | <i>Critomolgus foxi</i> (Gurney, 1927)                                                                     | Rhy | NC | 2         | Humes, 1990                                                                         |
| <i>Cladiella humesi</i> Verseveldt, 1974            | <i>Critomolgus linguifer</i> Kim, 2003                                                                     | Rhy | NC | 2         | Kim, 2003                                                                           |
| <i>Cladiella humesi</i> Verseveldt, 1974            | <i>Doridicola cincinnatus</i> (Humes, 1975)                                                                | Rhy | NC | 3         | Humes, 1990                                                                         |
| <i>Cladiella humesi</i> Verseveldt, 1974            | <i>Doridicola mimicus</i> (Humes, 1975)                                                                    | Rhy | NC | 2         | Kim, 2003                                                                           |
| <i>Cladiella humesi</i> Verseveldt, 1974            | <i>Paredromolgus decorus</i> (Humes, Frost, 1964)                                                          | Rhy | NC | 2         | Humes, 1990                                                                         |
| <i>Cladiella kremphi</i> (Hickson, 1919)            | <i>Critomolgus foxi</i> (Gurney, 1927)                                                                     | Rhy | MG | 1         | Humes, Ho, 1968c                                                                    |
| <i>Cladiella kremphi</i> (Hickson, 1919)            | <i>Doridicola hetaericus</i> (Humes, Ho, 1968) (= <i>Lichomolgus hetaericus</i> (Humes, Ho, 1968))         | Rhy | MG | 1         | Humes, Ho, 1968c                                                                    |
| <i>Cladiella laciniosa</i> (Tixier-Durivault, 1944) | <i>Critomolgus foxi</i> (Gurney, 1927) (= <i>Doridicola foxi</i> (Gurney, 1927))                           | Rhy | MG | 2         | Humes, Stock, 1973                                                                  |
| <i>Cladiella laciniosa</i> (Tixier-Durivault, 1944) | <i>Doridicola hetaericus</i> (Humes, Ho, 1968) (= <i>Metaxymolgus hetaericus</i> (Humes, Ho, 1968))        | Rhy | MG | 2         | Humes, Stock, 1973                                                                  |
| <i>Cladiella laciniosa</i> (Tixier-Durivault, 1944) | <i>Paredromolgus decorus</i> (Humes, Frost, 1964)                                                          | Rhy | MG | 2         | Humes, 1990                                                                         |
| <i>Cladiella latissima</i> (Tixier-Durivault, 1944) | <i>Critomolgus foxi</i> (Gurney, 1927) (= <i>Doridicola foxi</i> (Gurney, 1927))                           | Rhy | MG | 1; 18     | Humes, Stock, 1973                                                                  |
| <i>Cladiella latissima</i> (Tixier-Durivault, 1944) | <i>Paredromolgus decorus</i> (Humes, Frost, 1964)                                                          | Rhy | MG | 1; 18     | Humes, Stock, 1973                                                                  |
| <i>Cladiella pachyclados</i> (Klunzinger, 1877)     | <i>Critomolgus antennulus</i> Humes, 1990                                                                  | Rhy | NC | 0,5; 1; 2 | Humes, 1990                                                                         |
| <i>Cladiella pachyclados</i> (Klunzinger, 1877)     | <i>Critomolgus cladiellae</i> Humes, 1990                                                                  | Rhy | NC | 0,5; 1; 2 | Humes, 1990                                                                         |

|                                                   |                                                                                                    |     |        |            |                                            |
|---------------------------------------------------|----------------------------------------------------------------------------------------------------|-----|--------|------------|--------------------------------------------|
| <i>Cladiella pachyclados</i> (Klunzinger, 1877)   | <i>Critomolgus foxi</i> (Gurney, 1927)                                                             | Rhy | ID; NC | 0,5; 2; 10 | Humes, 1990                                |
| <i>Cladiella pachyclados</i> (Klunzinger, 1877)   | <i>Critomolgus orectopus</i> Humes, 1990                                                           | Rhy | NC     | 0,5; 1; 2  | Humes, 1990                                |
| <i>Cladiella pachyclados</i> (Klunzinger, 1877)   | <i>Doridicola cincinnatus</i> (Humes, 1975) (= <i>Metaxymolgus cincinnatus</i> Humes, 1975)        | Rhy | NC     | 0,5; 1; 2  | Humes, 1975                                |
| <i>Cladiella pachyclados</i> (Klunzinger, 1877)   | <i>Doridicola hetaericus</i> (Humes, Ho, 1968) (= <i>Lichomolgus hetaericus</i> (Humes, Ho, 1968)) | Rhy | MG     | 1          | Humes, Ho, 1968c                           |
| <i>Cladiella pachyclados</i> (Klunzinger, 1877)   | <i>Doridicola mimicus</i> (Humes, 1975) (= <i>Metaxymolgus mimicus</i> (Humes, 1975))              | Rhy | NC     | 0,5; 1; 2  | Humes, 1975                                |
| <i>Cladiella rotundata</i> Tixier-Durivault, 1970 | <i>Doridicola cincinnatus</i> (Humes, 1975)                                                        | Rhy | NC     |            | Humes, 1990                                |
| <i>Cladiella rotundata</i> Tixier-Durivault, 1970 | <i>Paredromolgus decorus</i> (Humes, Frost, 1964)                                                  | Rhy | NC     | 5          | Humes, 1990                                |
| <i>Cladiella similis</i> (Tixier-Durivault, 1944) | <i>Doridicola cincinnatus</i> (Humes, 1975)                                                        | Rhy | NC     | 2          | Humes, 1990                                |
| <i>Cladiella sphaerophora</i> (Ehrenberg, 1834)   | <i>Critomolgus foxi</i> (Gurney, 1927) (= <i>Doridicola foxi</i> (Gurney, 1927))                   | Rhy | MG     | 1          | Humes, Stock, 1973                         |
| <i>Cladiella sphaerophora</i> (Ehrenberg, 1834)   | <i>Doridicola cincinnatus</i> (Humes, 1975)                                                        | Rhy | NC     | 20 cm      | Humes, 1990                                |
| <i>Cladiella sphaerophora</i> (Ehrenberg, 1834)   | <i>Paredromolgus decorus</i> (Humes, Frost, 1964)                                                  | Rhy | MG     | 1          | Humes, Stock, 1973                         |
| <i>Klyxum flaccidum</i> (Tixier-Durivault, 1966)  | <i>Paradoridicola angularis</i> Humes, 1990                                                        | Rhy | MG     | 12; 20     | Humes, 1990                                |
| <i>Klyxum flaccidum</i> (Tixier-Durivault, 1966)  | <i>Paradoridicola drepanophorus</i> Humes, 1990                                                    | Rhy | MG     | 12; 20     | Humes, 1990                                |
| <i>Klyxum legitimum</i> (Tixier-Durivault, 1970)  | <i>Paramolgus alcyoniicus</i> Humes, 1990                                                          | Rhy | NC     | 2; 30      | Humes, 1990                                |
| <i>Klyxum molle</i> (Thomson, Dean, 1931)         | <i>Paradoridicola angularis</i> Humes, 1990                                                        | Rhy | ID     | 3          | Humes, 1990                                |
| <i>Klyxum molle</i> (Thomson, Dean, 1931)         | <i>Paradoridicola drepanophorus</i> Humes, 1990                                                    | Rhy | ID     | 3          | Humes, 1990                                |
| <i>Klyxum molle</i> (Thomson, Dean, 1931)         | <i>Paramolgus timendus</i> Humes, 1990                                                             | Rhy | ID     | 3          | Humes, 1990                                |
| <i>Klyxum simplex</i> (Thomson, Dean, 1931)       | <i>Paradoridicola angularis</i> Humes, 1990                                                        | Rhy | NC     | 2          | Humes, 1990                                |
| <i>Klyxum simplex</i> (Thomson, Dean, 1931)       | <i>Paradoridicola drepanophorus</i> Humes, 1990                                                    | Rhy | NC     | 2          | Humes, 1990                                |
| <i>Klyxum simplex</i> (Thomson, Dean, 1931)       | <i>Paradoridicola simulator</i> Humes, 1990                                                        | Rhy | NC     | 0,5; 2     | Humes, 1990                                |
| <i>Klyxum simplex</i> (Thomson, Dean, 1931)       | <i>Paramolgus alcyoniicus</i> Humes, 1990                                                          | Rhy | NC     | 0,5; 2     | Humes, 1990                                |
| <i>Klyxum simplex</i> (Thomson, Dean, 1931)       | <i>Paramolgus timendus</i> Humes, 1990                                                             | Rhy | NC     | 0,5; 2     | Humes, 1990                                |
| <i>Klyxum utinomii</i> (Verseveldt, 1971)         | <i>Paradoridicola angularis</i> Humes, 1990                                                        | Rhy | MG     | 12         | Humes, 1990                                |
| <i>Lobophytum crassum</i> von Marenzeller, 1886   | <i>Alcyonomolgus insolens</i> (Humes, Ho, 1968) (= <i>Lichomolgus insolens</i> (Humes, Ho, 1968))  | Rhy | MG; NC | 1; 2       | Humes, Ho, 1968c; Humes, 1975; Humes, 1990 |

|                                                        |                                                  |     |        |                  |                          |
|--------------------------------------------------------|--------------------------------------------------|-----|--------|------------------|--------------------------|
| <i>Lobophytum crassum</i> von Marenzeller, 1886        | <i>Anisomolgus limbatus</i> Humes, Dojiri, 1979  | Rhy | ID     | 3                | Humes, Dojiri, 1979a     |
| <i>Lobophytum crassum</i> von Marenzeller, 1886        | <i>Panjakus auriculatus</i> Humes, Dojiri, 1979  | Anc | ID     | 3                | Humes, Dojiri, 1979a     |
| <i>Lobophytum crassum</i> von Marenzeller, 1886        | <i>Paramolgus abruptus</i> Humes, 1990           | Rhy | MG     | 25               | Humes, 1990              |
| <i>Lobophytum crassum</i> von Marenzeller, 1886        | <i>Paramolgus eniwetokensis</i> Humes, 1973      | Rhy | NC     |                  | Humes, 1975              |
| <i>Lobophytum crassum</i> von Marenzeller, 1886        | <i>Paramolgus inconstans</i> Humes, Dojiri, 1979 | Rhy | ID     | 2                | Humes, Dojiri, 1979a     |
| <i>Lobophytum crebriplicatum</i> von Marenzeller, 1886 | <i>Alcyonomolgus insolens</i> (Humes, Ho, 1968)  | Rhy | NC     | 2; 3             | Humes, 1975              |
| <i>Lobophytum crebriplicatum</i> von Marenzeller, 1886 | <i>Paramolgus eniwetokensis</i> Humes, 1973      | Rhy | NC     | 2; 3             | Humes, 1975              |
| <i>Lobophytum crebriplicatum</i> von Marenzeller, 1886 | <i>Paramolgus spathophorus</i> (Humes, Ho, 1968) | Rhy | NC     | 2; 3             | Humes, 1975              |
| <i>Lobophytum depressum</i> Tixier-Durivault, 1966     | <i>Alcyonomolgus dissimilis</i> (Humes, 1982)    | Rhy | MG     | 25               | Humes, 1990              |
| <i>Lobophytum latilobatum</i> Verseveldt, 1971         | <i>Paramolgus modicus</i> Humes, 1990            | Rhy | MG     | 1                | Humes, 1990              |
| <i>Lobophytum pauciflorum</i> (Ehrenberg, 1834)        | <i>Alcyonomolgus insolens</i> (Humes, Ho, 1968)  | Rhy | NC     | 0,5; 1; 2; 4     | Humes, 1990              |
| <i>Lobophytum pauciflorum</i> (Ehrenberg, 1834)        | <i>Alcyonomolgus lumellifer</i> Humes, 1990      | Rhy | MG; NC | 0,5; 17          | Humes, 1990              |
| <i>Lobophytum pauciflorum</i> (Ehrenberg, 1834)        | <i>Critomolgus orectopus</i> Humes, 1990         | Rhy | NC     | 0,5; 1           | Humes, 1990              |
| <i>Lobophytum pauciflorum</i> (Ehrenberg, 1834)        | <i>Paramolgus eniwetokensis</i> Humes, 1973      | Rhy | MH; NC | 0,5; 1; 2; 3; 5  | Humes, 1973; Humes, 1990 |
| <i>Lobophytum pauciflorum</i> (Ehrenberg, 1834)        | <i>Paramolgus inconstans</i> Humes, Dojiri, 1979 | Rhy | NC     | 2                | Humes, 1990              |
| <i>Lobophytum pauciflorum</i> (Ehrenberg, 1834)        | <i>Paramolgus ostentus</i> Humes, 1973           | Rhy | MH     | 2                | Humes, 1973              |
| <i>Lobophytum pauciflorum</i> (Ehrenberg, 1834)        | <i>Paramolgus spathophorus</i> (Humes, Ho, 1968) | Rhy | MG; NC | 0,5; 1; 2; 4; 17 | Humes, 1990              |
| <i>Lobophytum pauciflorum</i> (Ehrenberg, 1834)        | <i>Telestacicola lobophyti</i> Humes, 1990       | Rhy | MG     | 17               | Humes, 1990              |
| <i>Lobophytum schoedei</i> Moser, 1919                 | <i>Enalcyonium auriculatum</i> Kim, 2004         | Lam | NC     | 1                | Kim, 2004                |
| <i>Lobophytum schoedei</i> Moser, 1919                 | <i>Enalcyonium caledonensis</i> Kim, 2004        | Lam | NC     | 1                | Kim, 2004                |
| <i>Lobophytum schoedei</i> Moser, 1919                 | <i>Enalcyonium humesi</i> Kim, 2004              | Lam | NC     | 1                | Kim, 2004                |
| <i>Lobophytum schoedei</i> Moser, 1919                 | <i>Enalcyonium lobophyti</i> Kim, 2004           | Lam | NC     | 1                | Kim, 2004                |
| <i>Rhytisma fulvum</i> (Forskål, 1775)                 | <i>Doridicola singularipes</i> (Humes, Ho, 1968) | Rhy | MG     | 20 cm; 0,5       | Humes, 1990              |
| <i>Rhytisma fulvum</i> (Forskål, 1775)                 | <i>Monomolgus unihastatus</i> Humes, Frost, 1964 | Rhy | MG     | 1                | Humes, Stock, 1973       |

|                                                     |                                                                                                                                                            |     |        |                      |                                                   |
|-----------------------------------------------------|------------------------------------------------------------------------------------------------------------------------------------------------------------|-----|--------|----------------------|---------------------------------------------------|
| <i>Rhytisma fulvum</i> (Forskål, 1775)              | <i>Paramolgus congruus</i> Humes, 1990                                                                                                                     | Rhy | MG     | 15 cm; 20 cm; 0,5    | Humes, 1990                                       |
| <i>Rhytisma fuscum</i> (Thomson, Henderson, 1906)   | <i>Byssone operculatus</i> Stock, Humes, 1970                                                                                                              | Not | MG     | 30 cm                | Stock, Humes, 1970                                |
| <i>Rhytisma fuscum</i> (Thomson, Henderson, 1906)   | <i>Demoixys affinis</i> Stock, Humes, 1970                                                                                                                 | Not | MG     | 30 cm                | Stock, Humes, 1970                                |
| <i>Rhytisma fuscum</i> (Thomson, Henderson, 1906)   | <i>Paramolgus congruus</i> Humes, 1990                                                                                                                     | Rhy | MG     | 15 cm; 20 cm; 0,5; 1 | Humes, 1990                                       |
| <i>Rhytisma fuscum</i> (Thomson, Henderson, 1906)   | <i>Paranotodelphys procax</i> Stock, Humes, 1970                                                                                                           | Not | MG     | 0,3; 0,6             | Stock, Humes, 1970                                |
| <i>Rhytisma fuscum</i> (Thomson, Henderson, 1906)   | <i>Paranotodelphys procax</i> Stock, Humes, 1970                                                                                                           | Not | MG     | 0,3; 0,6             | Stock, Humes, 1970                                |
| <i>Rhytisma fuscum</i> (Thomson, Henderson, 1906)   | <i>Thoracodelphys uniseta</i> Stock, Humes, 1970                                                                                                           | Not | MG     | 50 cm                | Stock, Humes, 1970                                |
| <i>Rhytisma rubiginosum</i> (Verseveldt, 1968)      | <i>Doridicola singularipes</i> (Humes, Ho, 1968) (= <i>Lichomolgus singularipes</i> (Humes, Ho, 1968); <i>Metaxymolgus singularipes</i> (Humes, Ho, 1968)) | Rhy | MG     | 1; 2                 | Humes, Ho, 1968c; Humes, Stock, 1973              |
| <i>Sarcophyton cornispiculatum</i> Verseveldt, 1971 | <i>Alcyonomolgus sarcophyticus</i> (Humes, 1982) (= <i>Anisomolgus sarcophyticus</i> (Humes, 1982))                                                        | Rhy | MG     | 17                   | Humes, 1982                                       |
| <i>Sarcophyton crassum</i> Tixier-Durivault, 1946   | <i>Anisomolgus pterolobatus</i> Humes, 1982                                                                                                                | Rhy | NC     | 1,5                  | Humes, 1982                                       |
| <i>Sarcophyton ehrenbergi</i> v. Marenzeller, 1886  | <i>Alcyonomolgus bicrenatus</i> (Humes, 1982) (= <i>Anisomolgus bicrenatus</i> Humes, 1982)                                                                | Rhy | NC     | 1                    | Humes, 1982                                       |
| <i>Sarcophyton ehrenbergi</i> v. Marenzeller, 1886  | <i>Alcyonomolgus dissimilis</i> (Humes, 1982) (= <i>Anisomolgus dissimilis</i> (Humes, 1982))                                                              | Rhy | MG     | 25                   | Humes, 1982                                       |
| <i>Sarcophyton ehrenbergi</i> v. Marenzeller, 1886  | <i>Alcyonomolgus incisus</i> (Humes, Ho, 1968) (= <i>Lichomolgus incisus</i> Humes, Ho, 1968; <i>Anisomolgus incisus</i> (Humes, Ho, 1968))                | Rhy | ID; MG | 0,5; 3; 4            | Humes, Ho, 1968c; Humes, Stock, 1973; Humes, 1982 |
| <i>Sarcophyton ehrenbergi</i> v. Marenzeller, 1886  | <i>Alcyonomolgus petalophorus</i> (Humes, 1982) (= <i>Anisomolgus petalophorus</i> (Humes, 1982))                                                          | Rhy | NC     | 3                    | Humes, 1982                                       |
| <i>Sarcophyton ehrenbergi</i> v. Marenzeller, 1886  | <i>Alcyonomolgus relativus</i> (Humes, 1982) (= <i>Anisomolgus relativus</i> (Humes, 1982))                                                                | Rhy | ID; NC | 1; 3                 | Humes, 1982                                       |
| <i>Sarcophyton ehrenbergi</i> v. Marenzeller, 1886  | <i>Paramolgus galeatus</i> Kim, 2003                                                                                                                       | Rhy | NC     |                      | Kim, 2003                                         |

|                                                          |                                                                                                         |     |        |                          |                                                         |
|----------------------------------------------------------|---------------------------------------------------------------------------------------------------------|-----|--------|--------------------------|---------------------------------------------------------|
| <i>Sarcophyton ehrenbergi</i> v. Marenzeller, 1886       | <i>Paramolgus spathophorus</i> (Humes, Ho, 1968)                                                        | Rhy | MG; NC | 3; 4; 25                 | Humes, Stock, 1973;<br>Humes, 1982                      |
| <i>Sarcophyton elegans</i> Moser, 1919                   | <i>Alcyonomolgus sarcophyticus</i> (Humes, 1982) (= <i>Anisomolgus sarcophyticus</i> (Humes, 1982))     | Rhy | NC     | 1; 2                     | Humes, 1982                                             |
| <i>Sarcophyton elegans</i> Moser, 1919                   | <i>Anisomolgus protentus</i> (Humes, Frost, 1964)                                                       | Rhy | NC     | 1                        | Humes, 1975                                             |
| <i>Sarcophyton elegans</i> Moser, 1919                   | <i>Anisomolgus pterolobatus</i> Humes, 1982                                                             | Rhy | NC     | 1; 2                     | Humes, 1982                                             |
| <i>Sarcophyton elegans</i> Moser, 1919                   | <i>Paramolgus spathophorus</i> (Humes, Ho, 1968)                                                        | Rhy | NC     | 1; 2                     | Humes, 1982                                             |
| <i>Sarcophyton glaucum</i> (Quoy, Gaimard, 1833)         | <i>Alcyonomolgus sarcophyticus</i> (Humes, 1982) (= <i>Anisomolgus sarcophyticus</i> (Humes, 1982))     | Rhy | ID; MG | 2; 3; 5                  | Humes, 1982                                             |
| <i>Sarcophyton glaucum</i> (Quoy, Gaimard, 1833)         | <i>Anisomolgus ensifer</i> Humes, 1982 (= <i>Anisomolgus ensiferus</i> (Humes, 1982))                   | Rhy | NC     | 1                        | Humes, 1982                                             |
| <i>Sarcophyton glaucum</i> (Quoy, Gaimard, 1833)         | <i>Anisomolgus protentus</i> (Humes, Frost, 1964)                                                       | Rhy | ID; MG | 1; 2; 3; 4;<br>5; 10; 17 | Humes, Stock, 1973;<br>Humes, 1982                      |
| <i>Sarcophyton glaucum</i> (Quoy, Gaimard, 1833)         | <i>Anisomolgus pterolobatus</i> Humes, 1982                                                             | Rhy | ID     | 5; 10                    | Humes, 1982                                             |
| <i>Sarcophyton glaucum</i> (Quoy, Gaimard, 1833)         | <i>Paradoridicola spinulatus</i> Humes, 1982                                                            | Rhy | ID     | 5; 10                    | Humes, 1982                                             |
| <i>Sarcophyton glaucum</i> (Quoy, Gaimard, 1833)         | <i>Paramolgus spathophorus</i> (Humes, Ho, 1968)                                                        | Rhy | MG; NC | 0,5; 1; 3;<br>17         | Humes, Ho, 1968c;<br>Humes, Stock, 1973;<br>Humes, 1982 |
| <i>Sarcophyton glaucum</i> (Quoy, Gaimard, 1833)         | <i>Perosyna indonesica</i> Humes, 1982                                                                  | Rhy | ID     | 5                        | Humes, 1982                                             |
| <i>Sarcophyton</i> sp.                                   | <i>Anisomolgus protentus</i> (Humes, Frost, 1964) (= <i>Lichomolgus protentus</i> (Humes, Frost, 1964)) | Rhy | MG     | 3                        | Humes, Frost, 1964                                      |
| <i>Sarcophyton stolidotum</i> Verseveldt, 1971           | <i>Paramolgus spathophorus</i> (Humes, Ho, 1968)                                                        | Rhy | MG     | 17                       | Humes, 1982                                             |
| <i>Sarcophyton trocheliophorum</i> von Marenzeller, 1886 | <i>Alcyonomolgus sarcophyticus</i> (Humes, 1982) (= <i>Anisomolgus sarcophyticus</i> (Humes, 1982))     | Rhy | NC     | 2                        | Humes, 1982                                             |
| <i>Sarcophyton trocheliophorum</i> von Marenzeller, 1886 | <i>Anisomolgus goniodes</i> Humes, 1982                                                                 | Rhy | NC     | 2                        | Humes, 1982                                             |
| <i>Sarcophyton trocheliophorum</i> von Marenzeller, 1886 | <i>Anisomolgus protentus</i> (Humes, Frost, 1964)                                                       | Rhy | NC     | 2                        | Humes, 1982                                             |

|                                                   |                                                                                              |     |        |               |                                                   |
|---------------------------------------------------|----------------------------------------------------------------------------------------------|-----|--------|---------------|---------------------------------------------------|
| <i>Sinularia arborea</i> Verseveldt, 1971         | <i>Paradoridicola sinulariae</i> Humes, Stock, 1973                                          | Rhy | MG     | 2; 12; 13; 23 | Humes, Stock, 1973                                |
| <i>Sinularia arborea</i> Verseveldt, 1971         | <i>Zamoligus acanthodes</i> Humes, Stock, 1973                                               | Rhy | MG     | 2; 12; 13; 23 | Humes, Stock, 1973                                |
| <i>Sinularia brassica</i> May, 1898               | <i>Paramolgus quadrangulus</i> Humes, 1990                                                   | Rhy | ID; NC | 2; 3; 10      | Humes, 1990                                       |
| <i>Sinularia ceramensis</i> Verseveldt, 1977      | <i>Paradoridicola squamiger</i> (Humes, Frost, 1964)                                         | Rhy | ID     | 2             | Humes, 1990                                       |
| <i>Sinularia firma</i> Tixier-Durivault, 1970     | <i>Colobomolgus cristatus</i> (Humes, Ho, 1968)                                              | Rhy | NC     | 3; 4          | Humes, 1990                                       |
| <i>Sinularia firma</i> Tixier-Durivault, 1970     | <i>Colobomolgus dentipes</i> (Thompson I.C., Scott A., 1903)                                 | Rhy | NC     | 3             | Humes, 1990                                       |
| <i>Sinularia firma</i> Tixier-Durivault, 1970     | <i>Colobomolgus epaxius</i> Humes, 1990                                                      | Rhy | NC     | 3             | Humes, 1990                                       |
| <i>Sinularia flexibilis</i> (Quoy, Gaimard, 1833) | <i>Paradoridicola contiguus</i> Humes, 1990                                                  | Rhy | ID     | 3; 4          | Humes, 1990                                       |
| <i>Sinularia flexibilis</i> (Quoy, Gaimard, 1833) | <i>Paradoridicola sinulariae</i> Humes, Stock, 1973                                          | Rhy | NC     | 3             | Humes, 1975                                       |
| <i>Sinularia gravis</i> Tixier-Durivault, 1970    | <i>Paradoridicola hystricosus</i> Humes, 1990                                                | Rhy | NC     | 1             | Humes, 1990                                       |
| <i>Sinularia gravis</i> Tixier-Durivault, 1970    | <i>Paradoridicola sinularianus</i> Humes, 1990                                               | Rhy | NC     | 1             | Humes, 1990                                       |
| <i>Sinularia humesi</i> Verseveldt, 1968          | <i>Colobomolgus dentipes</i> (Thompson I.C., Scott A., 1903)                                 | Rhy | MG     | 2; 13; 18     | Humes, Ho, 1968c; Humes, Stock, 1973              |
| <i>Sinularia humesi</i> Verseveldt, 1968          | <i>Meringomolgus hamatus</i> Humes, Stock, 1973                                              | Rhy | MG     | 13; 18        | Humes, Stock, 1973                                |
| <i>Sinularia leptoclados</i> (Ehrenberg, 1834)    | <i>Colobomolgus cristatus</i> (Humes, Ho, 1968) (= <i>Lichomolgus cristatus</i> (Humes, Ho)) | Rhy | MG; NC | 1; 2; 15; 20  | Humes, Ho, 1968c; Humes, Stock, 1973; Humes, 1990 |
| <i>Sinularia leptoclados</i> (Ehrenberg, 1834)    | <i>Colobomolgus laboutei</i> Humes, Stock, 1973                                              | Rhy | MG     | 1; 20         | Humes, Stock, 1973                                |
| <i>Sinularia leptoclados</i> (Ehrenberg, 1834)    | <i>Meringomolgus devotus</i> Humes, Stock, 1973                                              | Rhy | MG     | 1             | Humes, Stock, 1973                                |
| <i>Sinularia leptoclados</i> (Ehrenberg, 1834)    | <i>Meringomolgus hamatus</i> Humes, Stock, 1973                                              | Rhy | MG; NC | 1; 2; 15; 20  | Humes, Stock, 1973; Humes, 1990                   |
| <i>Sinularia maxima</i> Verseveldt, 1971          | <i>Meringomolgus hamatus</i> Humes, Stock, 1973                                              | Rhy | MG     | 1             | Humes, Stock, 1973                                |
| <i>Sinularia mayi</i> Lüttschwager, 1915          | <i>Doridicola patulus</i> (Humes, 1958) (= <i>Metaxymolgus patulus</i> (Humes, 1958))        | Rhy | MG     | 20            | Humes, Stock, 1973                                |
| <i>Sinularia minima</i> Verseveldt, 1971          | <i>Meringomolgus facetus</i> Humes, Stock, 1973                                              | Rhy | MG     | 15            | Humes, Stock, 1973                                |
| <i>Sinularia nanolobata</i> Verseveldt, 1977      | <i>Paradoridicola sinularianus</i> Humes, 1990                                               | Rhy | ID     | 2             | Humes, 1990                                       |



|                                                         |                                                                                                                 |     |        |                            |                                                           |
|---------------------------------------------------------|-----------------------------------------------------------------------------------------------------------------|-----|--------|----------------------------|-----------------------------------------------------------|
| <i>Sinularia pedunculata</i> Tixier-Durivault, 1945     | <i>Paradoridicola adelphus</i> (Humes, Ho, 1968)<br>(= <i>Lichomolgus adelphus</i> Humes, Ho, 1968)             | Rhy | YT     | 3                          | Humes, Ho, 1968c                                          |
| <i>Sinularia polydactyla</i> (Ehrenberg, 1834)          | <i>Colobomolgus bandensis</i> Humes, 1990                                                                       | Rhy | ID     | 2; 3                       | Humes, 1990                                               |
| <i>Sinularia polydactyla</i> (Ehrenberg, 1834)          | <i>Colobomolgus dentipes</i> (Thompson I.C.,<br>Scott A., 1903)                                                 | Rhy | NC     | 2                          | Humes, 1975                                               |
| <i>Sinularia polydactyla</i> (Ehrenberg, 1834)          | <i>Doridicola spinulifer</i> (Humes, Frost, 1964)<br>(= <i>Metaxymolgus spinulifer</i> (Humes, Frost,<br>1964)) | Rhy | MG     | 2                          | Humes, Stock, 1973                                        |
| <i>Sinularia polydactyla</i> (Ehrenberg, 1834)          | <i>Meringomolgus facetus</i> Humes, Stock, 1973                                                                 | Rhy | MG     | 2; 12                      | Humes, Stock, 1973                                        |
| <i>Sinularia polydactyla</i> (Ehrenberg, 1834)          | <i>Paradoridicola adelphus</i> (Humes, Ho, 1968)<br>(= <i>Lichomolgus adelphus</i> Humes, Ho, 1968)             | Rhy | MG     | 20 cm;<br>0,5; 1; 2;<br>15 | Humes, Ho, 1968c;<br>Humes, 1973; Humes,<br>1975          |
| <i>Sinularia polydactyla</i> (Ehrenberg, 1834)          | <i>Paradoridicola squamiger</i> (Humes, Frost,<br>1964) (= <i>Lichomolgus squamiger</i> Humes,<br>Frost, 1964)  | Rhy | MG; NC | 20 cm;<br>0,5; 1; 2;<br>15 | Humes, Frost, 1964;<br>Humes, Stock, 1973;<br>Humes, 1975 |
| <i>Sinularia polydactyla</i> (Ehrenberg, 1834)          | <i>Paradoridicola virgulifer</i> Humes, 1990                                                                    | Rhy | ID     | 2; 3                       | Humes, 1990                                               |
| <i>Sinularia polydactyla</i> (Ehrenberg, 1834)          | <i>Paramolgus clavatus</i> (Humes, Ho, 1968)                                                                    | Rhy | NC     | 2                          | Kim, 2003                                                 |
| <i>Sinularia whiteleggei</i> Lüttschwager, 1914         | <i>Paradoridicola adelphus</i> (Humes, Ho, 1968)<br>(= <i>Lichomolgus adelphus</i> Humes, Ho, 1968)             | Rhy | MG     | 2                          | Humes, Ho, 1968c                                          |
| <i>Sinularia whiteleggei</i> Lüttschwager, 1914         | <i>Paradoridicola squamiger</i> (Humes, Frost,<br>1964)                                                         | Rhy | MG     | 2                          | Humes, Ho, 1968c                                          |
| <b>Anthothelidae</b>                                    |                                                                                                                 |     |        |                            |                                                           |
| <i>Solenocaulon tortuosum</i> Gray, 1862                | <i>Acanthomolgus hales</i> Humes, Stock, 1973                                                                   | Rhy | MG     | 18                         | Humes, 1974                                               |
| <b>Briareidae</b>                                       |                                                                                                                 |     |        |                            |                                                           |
| <i>Briareum asbestinum</i> (Pallas, 1766)               | <i>Enalcyonium variicauda</i> Stock, 1973                                                                       | Lam | PR     | 1; 4; 6; 8                 | Stock, 1973                                               |
| <i>Briareum asbestinum</i> (Pallas, 1766)               | <i>Orecturus ortizi</i> Varela, Lalana, 2007                                                                    | Ast | CU     |                            | Varela, Lalana, 2007                                      |
| <i>Briareum violaceum</i> (Quoy, Gaimard, 1833)         | <i>Metapontius walteri</i> Johnsson, Neves, 2005                                                                | Art | MH     | 2                          | Johnsson, Neves, 2005                                     |
| <b>Chrysogorgiidae</b>                                  |                                                                                                                 |     |        |                            |                                                           |
| <i>Chrysogorgia flexilis</i> (Wright, Studer, 1889)     | <i>Enalcyonium forbesi</i> (T. Scott, 1901)                                                                     | Lam | ID     |                            | Versluys, 1902a                                           |
| <i>Chrysogorgia flexilis</i> (Wright, Studer, 1889)     | <i>Lamippe</i> sp.                                                                                              | Lam | ID     |                            | Versluys, 1902b;<br>Humes, 1975                           |
| <b>Clavulariidae</b>                                    |                                                                                                                 |     |        |                            |                                                           |
| <i>Rolandia coralloides</i> de Lacaze Duthiers,<br>1900 | <i>Lamippella faurei</i> Bouligand, Delamare<br>Deboutteville, 1959                                             | Lam | FR     |                            | Bouligand, Delamare<br>Deboutteville, 1959b               |

|                                                                      |                                                                                              |     |            |                    |                                                              |
|----------------------------------------------------------------------|----------------------------------------------------------------------------------------------|-----|------------|--------------------|--------------------------------------------------------------|
| <i>Telesto (Carijoa) arborea</i> Wright, Studer, 1889                | <i>Acanthomolgus telestophilus</i> (Humes, Ho, 1968)                                         | Rhy | MG         | 4                  | Humes, Ho, 1968b                                             |
| <b>Coelogorgiidae</b>                                                |                                                                                              |     |            |                    |                                                              |
| <i>Coelogorgia palmosa</i> Milne Edwards, Haime, 1857                | <i>Acanthomolgus telestophilus</i> (Humes, Ho, 1968)                                         | Rhy | MG         | 1; 2               | Humes, 1994                                                  |
| <i>Coelogorgia palmosa</i> Milne Edwards, Haime, 1857                | <i>Orecturus sakalavicus</i> Humes, 1994                                                     | Ast | MG; YT     | 1; 2; 3; 8; 15; 18 | Humes, 1994                                                  |
| <i>Coelogorgia palmosa</i> Milne Edwards, Haime, 1857                | <i>Paramolgus clavatus</i> (Humes, Ho, 1968) (= <i>Lichomolgus clavatus</i> Humes, Ho, 1968) | Rhy | MG         | 1; 2               | Humes, Ho, 1968b                                             |
| <i>Coelogorgia palmosa</i> Milne Edwards, Haime, 1857                | <i>Telestacicola angoti</i> Humes, Stock, 1973                                               | Rhy | MG         | 1; 3               | Humes, 1994                                                  |
| <b>Ellisellidae</b>                                                  |                                                                                              |     |            |                    |                                                              |
| <i>Ctenocella ramosa</i> (Simpson, 1910)                             | <i>Paramolgus ellisellae</i> Humes, 1974                                                     | Rhy | MG         | 24; 25             | Humes, 1974                                                  |
| <b>Gorgoniidae</b>                                                   |                                                                                              |     |            |                    |                                                              |
| <i>Antillogorgia acerosa</i> (Pallas, 1766)                          | <i>Acanthomolgus bilobipes</i> Humes, Stock, 1973                                            | Rhy | BB; CW; JM | 3; 4               | Humes, Stock, 1973; Stock, 1975c                             |
| <i>Antillogorgia acerosa</i> (Pallas, 1766)                          | <i>Lamippina aequalis</i> Stock, 1973                                                        | Lam | CW         | 3; 4               | Stock, 1973                                                  |
| <i>Antillogorgia acerosa</i> var. <i>elastica</i> Bielschowsky, 1929 | <i>Acanthomolgus bilobipes</i> Humes, Stock, 1973                                            | Rhy | PR         |                    | Humes, Stock, 1973                                           |
| <i>Antillogorgia americana</i> (Gmelin, 1791)                        | <i>Acanthomolgus dionyx</i> Stock, 1975                                                      | Rhy | CW         | 4                  | Stock, 1975c                                                 |
| <i>Antillogorgia</i> sp.                                             | <i>Lamippina aequalis</i> Stock, 1973                                                        | Lam | CW         | 3                  | Stock, 1973                                                  |
| <i>Eunicella singularis</i> (Esper, 1791)                            | <i>Doridicola botulosus</i> (Stock, Kleeton, 1963)                                           | Rhy | ES; Fr     | 10; 25; 30         | Stock, Kleeton, 1963a; Conradi, Megina, López-González, 2004 |
| <i>Eunicella verrucosa</i> (Pallas, 1766)                            | <i>Enalcyonium affinis</i> (Zulueta, 1908) (= <i>Lamippe affinis</i> Zulueta, 1908)          | Lam | FR         | 0; 2,2             | Zulueta, 1908; Bouligand, Delamare Deboutteville, 1959b      |
| <i>Gorgonia mariae</i> Bayer, 1961                                   | <i>Acanthomolgus triangulipes</i> Stock, 1975                                                | Rhy | CU         | 20                 | Varela et al., 2008                                          |
| <i>Gorgonia sarmentosa</i> Esper, 1789                               | <i>Enalcyonium pusillum</i> (Zulueta, 1908) (= <i>Lamippe pusilla</i> Zulueta, 1908)         | Lam | FR         |                    | Zulueta, 1908                                                |
| <i>Gorgonia ventalina</i> Linnaeus, 1758                             | <i>Acanthomolgus gorgoniae</i> Humes, 1973                                                   | Rhy | BM; BQ; CW | 2; 3               | Humes, 1973; Humes, 1973a; Stock, 1975c                      |

|                                                       |                                                                                                   |     |            |         |                        |
|-------------------------------------------------------|---------------------------------------------------------------------------------------------------|-----|------------|---------|------------------------|
| <i>Gorgonia ventalina</i> Linnaeus, 1758              | <i>Acanthomolgus triangulipes</i> Stock, 1975                                                     | Rhy | BQ; CW; MF | 2; 3    | Stock, 1975c           |
| <i>Gorgonia ventalina</i> Linnaeus, 1758              | <i>Sphaerippe</i> sp.                                                                             | Lam | NL-BQ3     | 2; 21   | Ivanenko et al., 2017  |
| <i>Leptogorgia sarmentosa</i> (Esper, 1789)           | <i>Enalcyonium pusillum</i> (Zulueta, 1908)                                                       | Lam | FR         | 40; 200 | Bouligand, 1960b       |
| <i>Leptogorgia sarmentosa</i> (Esper, 1789)           | <i>Enalcyonium scorpio</i> Stock, 1973                                                            | Lam | US         | 5       | Stock, 1973            |
| <i>Leptogorgia sarmentosa</i> (Esper, 1789)           | <i>Enalcyonium sympodii</i> (Zulueta, 1910) (= <i>Lamippe sympodii</i> Zulueta, 1910)             | Lam | FR         |         | Zulueta, 1910          |
| <i>Leptogorgia sarmentosa</i> (Esper, 1789)           | <i>Lamippina laubieri</i> Bouligand, 1960                                                         | Lam | FR         | 40; 200 | Bouligand, 1960b       |
| <i>Rumphella aggregata</i> (Nutting, 1910)            | <i>Enalcyonium ceramensis</i> Kim, 2007                                                           | Lam | ID         | 10      | Kim, 2007              |
| <i>Rumphella antipathes</i> (Linnaeus, 1758)          | <i>Acanthomolgus astrictus</i> Humes, Stock, 1973                                                 | Rhy | NC         | 1; 2    | Humes, 1993; Kim, 2004 |
| <b>Isididae</b>                                       |                                                                                                   |     |            |         |                        |
| <i>Acanella arbuscula</i> (Johnson, 1862)             | <i>Lamippella acanellae</i> Grygier, 1983                                                         | Lam | FR         | 1010    | Grygier, 1983          |
| <i>Primnoisis (Delicatosis) formosa</i> Gravier, 1913 | <i>Isidicola antarctica</i> Gravier, 1914                                                         | Lam | AQ         | 254     | Gravier, 1914          |
| <b>Melithaeidae</b>                                   |                                                                                                   |     |            |         |                        |
| <i>Melithaea ochracea</i> (Linnaeus, 1758)            | <i>Orecturus forticulus</i> Humes, 1993                                                           | Ast | ID         | 3       | Humes, 1993            |
| <i>Melithaea rubeola</i> (Wright, Studer, 1889)       | <i>Acanthomolgus mopsellae</i> Humes, 1974                                                        | Rhy | MG         | 3       | Humes, 1974            |
| <i>Melithaea rubeola</i> (Wright, Studer, 1889)       | <i>Forhania philippinensis</i> Humes, 1990                                                        | Thm | PH         | 40      | Humes, 1990a           |
| <i>Melithaea rubeola</i> (Wright, Studer, 1889)       | <i>Forhania philippinensis</i> Humes, 1990                                                        | Thm | PH         | 40      | Humes, 1990a           |
| <b>Nephtheidae</b>                                    |                                                                                                   |     |            |         |                        |
| <i>Capnella imbricata</i> (Quoy, Gaimard, 1833)       | <i>Doridicola capnellae</i> Humes, 1990                                                           | Rhy | ID         | 10      | Humes, 1990            |
| <i>Dendronephthya cirsium</i> Kükenthal, 1905         | <i>Acanthomolgus varirostratus</i> (Humes, Ho, 1968)                                              | Rhy | MG         | 35      | Humes, Stock, 1973     |
| <i>Dendronephthya cirsium</i> (Kükenthal, 1905)       |                                                                                                   |     |            |         |                        |
| <i>Dendronephthya cirsium</i> Kükenthal, 1905         | <i>Enalcyonium grandisetigerum</i> Kim, 2009                                                      | Lam | MG         |         | Kim, 2009              |
| <i>Dendronephthya cirsium</i> (Kükenthal, 1905)       |                                                                                                   |     |            |         |                        |
| <i>Dendronephthya grandiflora</i> Henderson, 1909     | <i>Acanthomolgus dispadactylus</i> Kim, 2007                                                      | Rhy | ID         | 10      | Kim, 2007              |
| <i>Dendronephthya grandiflora</i> Henderson, 1909     | <i>Acanthomolgus exilipes</i> (Humes, Ho, 1968)                                                   | Rhy | ID         | 10      | Kim, 2007              |
| <i>Dendronephthya grandiflora</i> Henderson, 1909     | <i>Acanthomolgus gomumuensis</i> Kim, 2007                                                        | Rhy | ID         | 10      | Kim, 2007              |
| <i>Dendronephthya hemprichi</i> Klunzinger, 1877      | <i>Enalcyonium ciliatum</i> Stock, 1972                                                           | Lam | ER; IL     | 3       | Stock, 1972            |
| <i>Dendronephthya koellikeri</i> Kükenthal, 1905      | <i>Acanthomolgus exilipes</i> (Humes, Ho, 1968) (= <i>Lichomolgus exilipes</i> (Humes, Ho, 1968)) | Rhy | MG         | 8       | Humes, Ho, 1968a       |

|                                                    |                                                                                                             |     |            |                                 |                                                                |
|----------------------------------------------------|-------------------------------------------------------------------------------------------------------------|-----|------------|---------------------------------|----------------------------------------------------------------|
| <i>Dendronephthya koellikeri</i> Kükenthal, 1905   | <i>Acanthomolgus gentilis</i> (Humes, Ho, 1968) (= <i>Lichomolgus gentilis</i> (Humes, Ho, 1968))           | Rhy | MG         | 8                               | Humes, Ho, 1968a                                               |
| <i>Dendronephthya koellikeri</i> Kükenthal, 1905   | <i>Acanthomolgus varirostratus</i> (Humes, Ho, 1968) (= <i>Lichomolgus varirostratus</i> (Humes, Ho, 1968)) | Rhy | MG         | 8                               | Humes, Ho, 1968a                                               |
| <i>Dendronephthya koellikeri</i> Kükenthal, 1905   | <i>Orecturus excavatus</i> (Humes, 1989) (= <i>Acontiophorus excavatus</i> Humes, 1989)                     | Ast | ID         | 10; 25                          | Humes, 1989                                                    |
| <i>Dendronephthya lokobeensis</i> Verseveldt, 1973 | <i>Acanthomolgus gentilis</i> (Humes, Ho, 1968)                                                             | Rhy | MG         | 4                               | Humes, Stock, 1973                                             |
| <i>Dendronephthya lokobeensis</i> Verseveldt, 1973 | <i>Acanthomolgus varirostratus</i> (Humes, Ho, 1968)                                                        | Rhy | MG         | 15                              | Humes, Stock, 1973                                             |
| <i>Dendronephthya mucronata</i> (Pütter, 1900)     | <i>Acanthomolgus cuneipes</i> (Humes, Ho, 1968)                                                             | Rhy | MG         | 1                               | Humes, Stock, 1973                                             |
| <i>Dendronephthya mucronata</i> (Pütter, 1900)     | <i>Acanthomolgus exilipes</i> (Humes, Ho, 1968) (= <i>Lichomolgus exilipes</i> (Humes, Ho, 1968))           | Rhy | ID; MG; NC | 25 mm; 1; 1,5; 3; 4; 10; 24; 25 | Humes, Ho, 1968a; Humes, Stock, 1973; Humes, 1975; Humes, 1990 |
| <i>Dendronephthya mucronata</i> (Pütter, 1900)     | <i>Acanthomolgus gentilis</i> (Humes, Ho, 1968) (= <i>Lichomolgus gentilis</i> (Humes, Ho, 1968))           | Rhy | MG         | 1; 1,5; 2; 3; 4; 10; 20; 24     | Humes, Ho, 1968a; Humes, Stock, 1973; Humes, 1975              |
| <i>Dendronephthya mucronata</i> (Pütter, 1900)     | <i>Acanthomolgus varirostratus</i> (Humes, Ho, 1968) (= <i>Lichomolgus varirostratus</i> (Humes, Ho, 1968)) | Rhy | MG; NC     | 1; 1,5; 2; 4; 10; 20; 24; 25    | Humes, Ho, 1968a; Humes, Stock, 1973; Humes, 1975              |
| <i>Dendronephthya mucronata</i> (Pütter, 1900)     | <i>Orecturus excavatus</i> (Humes, 1989) (= <i>Acontiophorus excavatus</i> Humes, 1989)                     | Ast | MG         | 1; 8; 25                        | Humes, 1989; Humes, 1994                                       |
| <i>Dendronephthya pütteri</i> Kükenthal, 1905      | <i>Acanthomolgus boholensis</i> Humes, 1990                                                                 | Rhy | PH         | 40                              | Humes, 1990                                                    |
| <i>Dendronephthya regia</i> Verseveldt, 1968       | <i>Acanthomolgus exilipes</i> (Humes, Ho, 1968) (= <i>Lichomolgus exilipes</i> (Humes, Ho, 1968))           | Rhy | MG         | 23; 26; 40                      | Humes, Ho, 1968a; Humes, Stock, 1973                           |
| <i>Dendronephthya regia</i> Verseveldt, 1968       | <i>Acanthomolgus varirostratus</i> (Humes, Ho, 1968) (= <i>Lichomolgus varirostratus</i> (Humes, Ho, 1968)) | Rhy | MG         | 25; 40                          | Humes, Ho, 1968a; Humes, Stock, 1973                           |
| <i>Dendronephthya regia</i> Verseveldt, 1968       | <i>Enalcyonium robustum</i> Kim, 2009                                                                       | Lam | MG         |                                 | Kim, 2009                                                      |
| <i>Dendronephthya</i> sp.                          | <i>Acanthomolgus exilipes</i> (Humes, Ho, 1968)                                                             | Rhy | MG         | 27                              | Humes, Stock, 1973                                             |
| <i>Dendronephthya</i> sp.                          | <i>Acanthomolgus gentilis</i> (Humes, Ho, 1968)                                                             | Rhy | MG         | 27                              | Humes, Stock, 1973                                             |
| <i>Dendronephthya</i> sp.                          | <i>Acanthomolgus longispinifer</i> (Humes, Ho, 1968)                                                        | Rhy | ID         | 17                              | Kim, 2007                                                      |

|                                                |                                                                                                             |     |        |                  |                                      |
|------------------------------------------------|-------------------------------------------------------------------------------------------------------------|-----|--------|------------------|--------------------------------------|
| <i>Dendronephthya</i> sp.                      | <i>Acanthomolgus varirostratus</i> (Humes, Ho, 1968)                                                        | Rhy | MG     | 27               | Humes, Stock, 1973                   |
| <i>Dendronephthya</i> sp.                      | <i>Orecturus excavatus</i> (Humes, 1989) (= <i>Acontiophorus excavatus</i> Humes, 1989)                     | Ast | ID; PH | 17; 30           | Humes, 1989; Humes, 1994             |
| <i>Dendronephthya</i> sp.                      | <i>Orecturus similis</i> Kim, Song, 2003                                                                    | Ast | KR     |                  | Kim, Song, 2003                      |
| <i>Dendronephthya speciosa</i> Kükenthal, 1905 | <i>Acanthomolgus exilipes</i> (Humes, Ho, 1968)                                                             | Rhy | MG     | 17; 24           | Humes, Stock, 1973                   |
| <i>Dendronephthya speciosa</i> Kükenthal, 1905 | <i>Acanthomolgus gentilis</i> (Humes, Ho, 1968)                                                             | Rhy | MG     | 17; 22           | Humes, Stock, 1973                   |
| <i>Dendronephthya speciosa</i> Kükenthal, 1905 | <i>Acanthomolgus varirostratus</i> (Humes, Ho, 1968)                                                        | Rhy | MG     | 10               | Humes, Stock, 1973                   |
| <i>Dendronephthya stocki</i> Verseveldt, 1968  | <i>Acanthomolgus exilipes</i> (Humes, Ho, 1968) (= <i>Lichomolgus exilipes</i> (Humes, Ho, 1968))           | Rhy | MG     | 25; 40           | Humes, Ho, 1968a; Humes, Stock, 1973 |
| <i>Dendronephthya stocki</i> Verseveldt, 1968  | <i>Acanthomolgus gentilis</i> (Humes, Ho, 1968) (= <i>Lichomolgus gentilis</i> (Humes, Ho, 1968))           | Rhy | MG     | 20               | Humes, Ho, 1968a                     |
| <i>Dendronephthya stocki</i> Verseveldt, 1968  | <i>Acanthomolgus varirostratus</i> (Humes, Ho, 1968) (= <i>Lichomolgus varirostratus</i> (Humes, Ho, 1968)) | Rhy | MG     | 20; 25; 40       | Humes, Ho, 1968a; Humes, Stock, 1973 |
| <i>Dendronephthya stocki</i> Verseveldt, 1968  | <i>Contomolgus lokobeensis</i> Humes, Stock, 1973                                                           | Rhy | MG     | 25               | Humes, Stock, 1973                   |
| <i>Gersemia fruticosa</i> (Sars, 1860)         | <i>Doridicola indistinctus</i> Ho, Ivanenko, 2013                                                           | Rhy | RU     | 24               | Ho, Ivanenko, 2013                   |
| <i>Gersemia rubiformis</i> (Ehrenberg, 1834)   | <i>Enalcyonium carrikeri</i> Dudley, 1973                                                                   | Lam | US     | 25; 28,4; 29; 35 | Dudley, 1973                         |
| <i>Gersemia rubiformis</i> (Ehrenberg, 1834)   | <i>Enalcyonium heegaardi</i> Bouligand, 1960                                                                | Lam | GL     | 2258             | Heegard, 1949                        |
| <i>Gersemia rubiformis</i> (Ehrenberg, 1834)   | <i>Lamippe rubra</i> Bruzelius, 1858                                                                        | Lam | FR     |                  | Olsson, 1869                         |
| <i>Lemnalia africana</i> (May, 1899)           | <i>Doridicola spinulifer</i> (Humes, Frost, 1964) (= <i>Metaxymolgus spinulifer</i> (Humes, Frost, 1964))   | Rhy | MG; YT | 2; 3; 12; 20     | Humes, Ho, 1968a; Humes, Stock, 1973 |
| <i>Lemnalia cervicornis</i> (May, 1898)        | <i>Paramolgus clavatus</i> (Humes, Ho, 1968)                                                                | Rhy | MG     | 20               | Humes, Stock, 1973                   |
| <i>Lemnalia crassicaulis</i> Verseveldt, 1969  | <i>Doridicola spinulifer</i> (Humes, Frost, 1964) (= <i>Metaxymolgus spinulifer</i> (Humes, Frost, 1964))   | Rhy | MG     | 20               | Humes, Stock, 1973                   |
| <i>Lemnalia crassicaulis</i> Verseveldt, 1969  | <i>Paramolgus clavatus</i> (Humes, Ho, 1968)                                                                | Rhy | MG     | 20               | Humes, Stock, 1973                   |
| <i>Lemnalia digitata</i> (May, 1898)           | <i>Doridicola spinulifer</i> (Humes, Frost, 1964) (= <i>Metaxymolgus spinulifer</i> (Humes, Frost, 1964))   | Rhy | MG     | 2; 17            | Humes, Stock, 1973                   |

|                                                  |                                                                                                           |     |            |                     |                                                   |
|--------------------------------------------------|-----------------------------------------------------------------------------------------------------------|-----|------------|---------------------|---------------------------------------------------|
| <i>Lemnalia elegans</i> (May, 1899)              | <i>Acanthomolgus fissisetiger</i> (Humes, Ho, 1968) (= <i>Lichomolgus fissisetiger</i> (Humes, Ho, 1968)) | Rhy | MG         | 1                   | Humes, Ho, 1968a                                  |
| <i>Lemnalia elegans</i> (May, 1899)              | <i>Doridicola spinulifer</i> (Humes, Frost, 1964) (= <i>Metaxymolgus spinulifer</i> (Humes, Frost, 1964)) | Rhy | MG; NC; YT | 15 cm; 1; 1,5; 2; 3 | Humes, Ho, 1968a; Humes, Stock, 1973; Humes, 1975 |
| <i>Lemnalia humesi</i> Verseveldt, 1969          | <i>Acanthomolgus fissisetiger</i> (Humes, Ho, 1968)                                                       | Rhy | MG         | 10                  | Humes, Stock, 1973                                |
| <i>Lemnalia longiramus</i> Verseveldt, 1969      | <i>Doridicola spinulifer</i> (Humes, Frost, 1964) (= <i>Metaxymolgus spinulifer</i> (Humes, Frost, 1964)) | Rhy | MG         | 12                  | Humes, Stock, 1973                                |
| <i>Lemnalia longiramus</i> Verseveldt, 1969      | <i>Paramolgus clavatus</i> (Humes, Ho, 1968)                                                              | Rhy | MG         | 12                  | Humes, Stock, 1973                                |
| <i>Lemnalia madagascarensis</i> Verseveldt, 1969 | <i>Doridicola spinulifer</i> (Humes, Frost, 1964) (= <i>Metaxymolgus spinulifer</i> (Humes, Frost, 1964)) | Rhy | MG         | 24                  | Humes, Stock, 1973                                |
| <i>Lemnalia</i> sp.                              | <i>Doridicola spinulifer</i> (Humes, Frost, 1964) (= <i>Lichomolgus spinulifer</i> (Humes, Frost, 1964))  | Rhy | MG         | 1                   | Humes, Frost, 1964                                |
| <i>Lemnalia tenuis</i> Verseveldt, 1969          | <i>Doridicola spinulifer</i> (Humes, Frost, 1964) (= <i>Metaxymolgus spinulifer</i> (Humes, Frost, 1964)) | Rhy | MG         | 50                  | Humes, Stock, 1973                                |
| <i>Litophyton amentaceum</i> (Studer, 1894)      | <i>Doridicola aculeatus</i> (Humes, Ho, 1968) (= <i>Metaxymolgus aculeatus</i> (Humes, Ho, 1968))         | Rhy | MG         | 2; 13               | Humes, Stock, 1973                                |
| <i>Litophyton arboreum</i> Forskål, 1775         | <i>Doridicola aculeatus</i> (Humes, Ho, 1968) (= <i>Lichomolgus aculeatus</i> (Humes, Ho, 1968))          | Rhy | MG         | 3                   | Humes, Ho, 1968a                                  |
| <i>Litophyton bumastum</i> (Verseveldt, 1973)    | <i>Doridicola aculeatus</i> (Humes, Ho, 1968) (= <i>Metaxymolgus aculeatus</i> (Humes, Ho, 1968))         | Rhy | MG         | 8                   | Humes, Stock, 1973                                |
| <i>Litophyton chabrolii</i> (Andouin, 1828)      | <i>Doridicola aculeatus</i> (Humes, Ho, 1968)                                                             | Rhy | ID         | 2                   | Humes, 1980                                       |
| <i>Litophyton chabrolii</i> (Andouin, 1828)      | <i>Paramolgus nephthaenus</i> Humes, 1980                                                                 | Rhy | ID         | 2                   | Humes, 1980                                       |
| <i>Litophyton crassum</i> (Kükenthal, 1903)      | <i>Doridicola aculeatus</i> (Humes, Ho, 1968) (= <i>Lichomolgus aculeatus</i> (Humes, Ho, 1968))          | Rhy | MG         | 2                   | Humes, Ho, 1968a                                  |
| <i>Litophyton crassum</i> (Kükenthal, 1903)      | <i>Doridicola aculeatus</i> (Humes, Ho, 1968) (= <i>Lichomolgus aculeatus</i> (Humes, Ho, 1968))          | Rhy | MG         | 2                   | Humes, Ho, 1968a                                  |

|                                                    |                                                                                                   |     |            |              |                                 |
|----------------------------------------------------|---------------------------------------------------------------------------------------------------|-----|------------|--------------|---------------------------------|
| <i>Litophyton cupressiformis</i> (Kükenthal, 1903) | <i>Doridicola aculeatus</i> (Humes, Ho, 1968) (= <i>Metaxymolgus lumarius</i> (Humes, 1980))      | Rhy | ID         | 3            | Humes, 1980                     |
| <i>Litophyton filamentosum</i> (Verseveldt, 1973)  | <i>Doridicola aculeatus</i> (Humes, Ho, 1968) (= <i>Metaxymolgus aculeatus</i> (Humes, Ho, 1968)) | Rhy | MG         | 23           | Humes, Stock, 1973              |
| <i>Litophyton lanternarium</i> (Verseveldt, 1973)  | <i>Doridicola aculeatus</i> (Humes, Ho, 1968) (= <i>Metaxymolgus aculeatus</i> (Humes, Ho, 1968)) | Rhy | MG         | 15           | Humes, Stock, 1973              |
| <i>Litophyton savignyi</i> (Ehrenberg, 1834)       | <i>Doridicola aculeatus</i> (Humes, Ho, 1968) (= <i>Lichomolgus aculeatus</i> (Humes, Ho, 1968))  | Rhy | ID         | 3; 8; 10     | Humes, 1980                     |
| <i>Litophyton savignyi</i> (Ehrenberg, 1834)       | <i>Paramolgus accinctus</i> Humes, 1980                                                           | Rhy | ID         | 3            | Humes, 1980                     |
| <i>Litophyton savignyi</i> (Ehrenberg, 1834)       | <i>Paramolgus nephthaenus</i> Humes, 1980                                                         | Rhy | ID         | 3            | Humes, 1980                     |
| <i>Litophyton savignyi</i> (Ehrenberg, 1834)       | <i>Paramolgus promiculus</i> Humes, 1980 (= <i>Paramolgus prominulus</i> Humes, 1980)             | Rhy | ID; NC     | 3; 30        | Humes, 1980                     |
| <i>Litophyton sphaerophorum</i> (Kükenthal, 1903)  | <i>Doridicola aculeatus</i> (Humes, Ho, 1968) (= <i>Lichomolgus aculeatus</i> (Humes, Ho, 1968))  | Rhy | ID; MG     | 2; 3         | Humes, Ho, 1968a; Humes, 1980   |
| <i>Litophyton sphaerophorum</i> (Kükenthal, 1903)  | <i>Mecra ellipsaria</i> Humes, 1980                                                               | Rhy | ID         | 2            | Humes, 1980                     |
| <i>Litophyton sphaerophorum</i> (Kükenthal, 1903)  | <i>Paramolgus accinctus</i> Humes, 1980                                                           | Rhy | ID         | 2            | Humes, 1980                     |
| <i>Litophyton sphaerophorum</i> (Kükenthal, 1903)  | <i>Paramolgus nephthaenus</i> Humes, 1980                                                         | Rhy | ID         | 2            | Humes, 1980                     |
| <i>Litophyton sphaerophorum</i> (Kükenthal, 1903)  | <i>Paramolgus promiculus</i> Humes, 1980                                                          | Rhy | ID         | 2            | Humes, 1980                     |
| <i>Litophyton striatum</i> (Kükenthal, 1903)       | <i>Acanthomolgus ambonensis</i> Kim, 2007                                                         | Rhy | ID         | 3            | Kim, 2007                       |
| <i>Litophyton striatum</i> (Kükenthal, 1903)       | <i>Acanthomolgus tenuispinatus</i> Kim, 2009                                                      | Rhy | MG         | 25           | Kim, 2009                       |
| <i>Litophyton striatum</i> (Kükenthal, 1903)       | <i>Doridicola aculeatus</i> (Humes, Ho, 1968) (= <i>Metaxymolgus aculeatus</i> (Humes, Ho, 1968)) | Rhy | ID; MG; YT | 1; 3; 22; 25 | Humes, Stock, 1973; Humes, 1980 |
| <i>Litophyton striatum</i> (Kükenthal, 1903)       | <i>Doridicola lumarius</i> (Humes, 1980) (= <i>Metaxymolgus lumarius</i> (Humes, 1980))           | Rhy | ID         | 3            | Humes, 1980                     |
| <i>Litophyton striatum</i> (Kükenthal, 1903)       | <i>Paramolgus accinctus</i> Humes, 1980                                                           | Rhy | ID         | 3            | Humes, 1980                     |
| <i>Litophyton striatum</i> (Kükenthal, 1903)       | <i>Paramolgus nephthaenus</i> Humes, 1980                                                         | Rhy | ID         | 3            | Humes, 1980                     |
| <i>Litophyton viridis</i> (May, 1899)              | <i>Doridicola aculeatus</i> (Humes, Ho, 1968)                                                     | Rhy | ID         | 3            | Humes, Dojiri, 1979b            |
| <i>Litophyton viridis</i> (May, 1899)              | <i>Doridicola aculeatus</i> (Humes, Ho, 1968)                                                     | Rhy | ID         | 10           | Humes, Dojiri, 1979b            |
| <i>Litophyton viridis</i> (May, 1899)              | <i>Paramolgus accinctus</i> Humes, 1980                                                           | Rhy | ID         | 3            | Humes, Dojiri, 1979b            |

|                                                         |                                                                                                           |     |            |                        |                                                                |
|---------------------------------------------------------|-----------------------------------------------------------------------------------------------------------|-----|------------|------------------------|----------------------------------------------------------------|
| <i>Litophyton viridis</i> (May, 1899)                   | <i>Paramolgus litophyticus</i> Humes, Dojiri, 1979                                                        | Rhy | ID         | 10                     | Humes, Dojiri, 1979b                                           |
| <i>Litophyton viridis</i> (May, 1899)                   | <i>Paramolgus promiculus</i> Humes, 1980                                                                  | Rhy | ID         | 3; 10                  | Humes, Dojiri, 1979b                                           |
| <i>Litophyton viridis</i> (May, 1899)                   | <i>Paramolgus resectus</i> Humes, Dojiri, 1979                                                            | Rhy | ID         | 3                      | Humes, Dojiri, 1979b                                           |
| <i>Paralemnalia clavata</i> Verseveldt, 1969            | <i>Doridicola spinulifer</i> (Humes, Frost, 1964) (= <i>Metaxymolgus spinulifer</i> (Humes, Frost, 1964)) | Rhy | MG         | 2                      | Humes, Stock, 1973                                             |
| <i>Paralemnalia thyrsoides</i> (Ehrenberg, 1834)        | <i>Doridicola senticauda</i> Humes, 1990                                                                  | Rhy | NC         | 3                      | Humes, 1990                                                    |
| <i>Paralemnalia thyrsoides</i> (Ehrenberg, 1834)        | <i>Doridicola spinulifer</i> (Humes, Frost, 1964) (= <i>Metaxymolgus spinulifer</i> (Humes, Frost, 1964)) | Rhy | ID; MG; NC | 3; 10; 12; 18; 20      | Humes, Ho, 1968a; Humes, Stock, 1973; Humes, 1975; Humes, 1990 |
| <i>Paralemnalia thyrsoides</i> (Ehrenberg, 1834)        | <i>Doridicola vulcanius</i> Humes, 1990                                                                   | Rhy | ID         | 3                      | Humes, 1990                                                    |
| <i>Paralemnalia thyrsoides</i> (Ehrenberg, 1834)        | <i>Paramolgus centor</i> Humes, 1990                                                                      | Rhy | ID; NC     | 3; 10                  | Humes, 1990                                                    |
| <i>Stereonephthya acaulis</i> Verseveldt, 1968          | <i>Acanthomolgus cuneipes</i> (Humes, Ho, 1968) (= <i>Lichomolgus cuneipes</i> (Humes, Ho, 1968))         | Rhy | MG         | 1; 2; 10               | Humes, Ho, 1968a                                               |
| <i>Stereonephthya acaulis</i> Verseveldt, 1968          | <i>Acanthomolgus fissisetiger</i> (Humes, Ho, 1968) (= <i>Lichomolgus fissisetiger</i> (Humes, Ho, 1968)) | Rhy | MG         | 1; 2; 10; 15           | Humes, Ho, 1968a; Humes, Stock, 1973                           |
| <i>Stereonephthya acaulis</i> Verseveldt, 1968          | <i>Acanthomolgus gentilis</i> (Humes, Ho, 1968) (= <i>Lichomolgus gentilis</i> (Humes, Ho, 1968))         | Rhy | MG         | 1; 2; 4; 8; 10; 17; 20 | Humes, Ho, 1968a; Humes, Stock, 1973                           |
| <i>Stereonephthya cordylophora</i> Verseveldt, 1973     | <i>Acanthomolgus exilipes</i> (Humes, Ho, 1968)                                                           | Rhy | MG         | 24                     | Humes, Stock, 1973                                             |
| <i>Stereonephthya cordylophora</i> Verseveldt, 1973     | <i>Acanthomolgus gentilis</i> (Humes, Ho, 1968)                                                           | Rhy | MG         | 24                     | Humes, Stock, 1973                                             |
| <i>Stereonephthya cordylophora</i> Verseveldt, 1973     | <i>Acanthomolgus varirostratus</i> (Humes, Ho, 1968)                                                      | Rhy | MG         | 24                     | Humes, Stock, 1973                                             |
| <i>Stereonephthya cordylophora</i> Verseveldt, 1973     | <i>Orecturus grandisetiger</i> Humes, 1992                                                                | Ast | MG         | 24                     | Humes, 1994                                                    |
| <i>Stereonephthya inordinata</i> Tixier-Durivault, 1970 | <i>Doridicola parvicaudatus</i> Kim, 2003                                                                 | Rhy | NC         | 30                     | Kim, 2003                                                      |
| <i>Stereonephthya inordinata</i> Tixier-Durivault, 1970 | <i>Paramolgus clavatus</i> (Humes, Ho, 1968)                                                              | Rhy | NC         | 30                     | Humes, 1975                                                    |
| <i>Stereonephthya inordinata</i> Tixier-Durivault, 1970 | <i>Paramolgus nephthaenus</i> Humes, 1980                                                                 | Rhy | NC         | 30                     | Kim, 2003                                                      |
| <i>Stereonephthya inordinata</i> Tixier-Durivault, 1970 | <i>Paramolgus promiculus</i> Humes, 1980                                                                  | Rhy | NC         | 30                     | Kim, 2003                                                      |



|                                                         |                                                                                                             |     |    |            |                    |
|---------------------------------------------------------|-------------------------------------------------------------------------------------------------------------|-----|----|------------|--------------------|
| <i>Stereonephthya inordinata</i> Tixier-Durivault, 1970 | <i>Ruthra humesi</i> Kim, 2003                                                                              | Cyc | NC | 30         | Kim, 2003          |
| <i>Stereonephthya nosybearia</i> Verseveldt, 1973       | <i>Doridicola aculeatus</i> (Humes, Ho, 1968) (= <i>Metaxymolgus aculeatus</i> (Humes, Ho, 1968))           | Rhy | MG | 10         | Humes, Stock, 1973 |
| <i>Stereonephthya papyracea</i> Kükenthal, 1905         | <i>Acanthomolgus fissisetiger</i> (Humes, Ho, 1968) (= <i>Lichomolgus fissisetiger</i> (Humes, Ho, 1968))   | Rhy | MG | 6          | Humes, Ho, 1968a   |
| <i>Stereonephthya papyracea</i> Kükenthal, 1905         | <i>Acanthomolgus gentilis</i> (Humes, Ho, 1968) (= <i>Lichomolgus gentilis</i> (Humes, Ho, 1968))           | Rhy | MG | 6          | Humes, Ho, 1968a   |
| <i>Stereonephthya scaphis</i> Verseveldt, 1973          | <i>Doridicola aculeatus</i> (Humes, Ho, 1968) (= <i>Metaxymolgus aculeatus</i> (Humes, Ho, 1968))           | Rhy | MG | 25         | Humes, Stock, 1973 |
| <i>Stereonephthya ulicoides</i> Thomson, Dean, 1931     | <i>Parategastes conexus</i> Humes, 1984                                                                     | Teg | ID | 10         | Humes, 1984        |
| <i>Umbellulifera striata</i> (Thomson, Henderson, 1905) | <i>Acanthomolgus gentilis</i> (Humes, Ho, 1968)                                                             | Rhy | MG | 17; 47     | Humes, Stock, 1973 |
| <b>Nidaliidae</b>                                       |                                                                                                             |     |    |            |                    |
| <i>Siphonogorgia pendula</i> Studer, 1889               | <i>Acanthomolgus hians</i> (Humes, Ho, 1968) (= <i>Lichomolgus hians</i> (Humes, Ho, 1968))                 | Rhy | MG | 10; 12; 20 | Humes, Ho, 1968b   |
| <i>Siphonogorgia pendula</i> Studer, 1889               | <i>Acanthomolgus longispinifer</i> (Humes, Ho, 1968) (= <i>Lichomolgus longispinifer</i> (Humes, Ho, 1968)) | Rhy | MG | 10; 12; 20 | Humes, Ho, 1968b   |
| <i>Siphonogorgia pichoni</i> Verseveldt, 1971           | <i>Acanthomolgus hians</i> (Humes, Ho, 1968)                                                                | Rhy | MG | 17; 25     | Humes, Stock, 1973 |
| <i>Siphonogorgia pichoni</i> Verseveldt, 1971           | <i>Acanthomolgus longispinifer</i> (Humes, Ho, 1968)                                                        | Rhy | MG | 17; 25     | Humes, Stock, 1973 |
| <i>Siphonogorgia pichoni</i> Verseveldt, 1971           | <i>Orecturus excavatus</i> (Humes, 1989)                                                                    | Ast | MG | 20         | Humes, 1994        |
| <i>Siphonogorgia variabilis</i> (Hickson, 1903)         | <i>Acanthomolgus brevifurca</i> Humes, 1990                                                                 | Rhy | ID | 10         | Humes, 1990        |
| <i>Siphonogorgia variabilis</i> (Hickson, 1903)         | <i>Acanthomolgus gentilis</i> (Humes, Ho, 1968)                                                             | Rhy | NC | 30         | Kim, 2003          |
| <i>Siphonogorgia variabilis</i> (Hickson, 1903)         | <i>Acanthomolgus varirostratus</i> (Humes, Ho, 1968)                                                        | Rhy | NC | 30         | Kim, 2003          |
| <i>Siphonogorgia variabilis</i> (Hickson, 1903)         | <i>Enalcyonium bullatum</i> Kim, 2004                                                                       | Lam | NC | 30         | Kim, 2004          |
| <i>Siphonogorgia variabilis</i> (Hickson, 1903)         | <i>Orecturus ampulus</i> Humes, 1996                                                                        | Ast | NC | 30         | Humes, 1996        |

#### Paragorgiidae

|                                                        |                                                                                     |     |        |                              |                                  |
|--------------------------------------------------------|-------------------------------------------------------------------------------------|-----|--------|------------------------------|----------------------------------|
| <i>Paragorgia arborea</i> (Linnaeus, 1758)             | <i>Buprorus</i> sp.                                                                 | Bup | CA     | 475; 477                     | Buhl-Mortensen, Mortensen, 2004  |
| <i>Paragorgia arborea</i> (Linnaeus, 1758)             | <i>Gorgonophilus canadensis</i> Buhl-Mortensen, Mortensen, 2004                     | Lam | CA; GL | 445; 475; 520; 560           | Buhl-Mortensen, Mortensen, 2004a |
| <i>Paragorgia arborea</i> (Linnaeus, 1758)             | <i>Lichomolgidae</i>                                                                | Lic | CA     | 332; 426; 446; 447; 475; 477 | Buhl-Mortensen, Mortensen, 2004  |
| <b>Paralcyoniidae</b>                                  |                                                                                     |     |        |                              |                                  |
| <i>Paralcyonium spinulosum</i> (Delle Chiaje, 1822)    | <i>Enalcyonium alcyonii</i> (Joliet, 1882) (= <i>Lamippe alcyonii</i> Joliet, 1882) | Lam |        |                              | Joliet, 1882                     |
| <i>Paralcyonium spinulosum</i> (Delle Chiaje, 1822)    | <i>Lamippula duthiersi</i> (Joliet, 1882)                                           | Lam | FR     |                              | Joliet, 1882                     |
| <i>Paralcyonium spinulosum</i> (Delle Chiaje, 1822)    | <i>Lamippula duthiersi</i> (Joliet, 1882) (= <i>Lamippe duthiersi</i> Joliet, 1882) | Lam | FR     |                              | Zulueta, 1908                    |
| <i>Studeriotis semperi</i> (Studer, 1888)              | <i>Ascetomolgus plicatus</i> Humes, Stock, 1972                                     | Rhy | MG     | 17                           | Humes, Stock, 1973               |
| <i>Studeriotis semperi</i> (Studer, 1888)              | <i>Contomolgus lokobeensis</i> Humes, Stock, 1973                                   | Rhy | MG     | 17; 18                       | Humes, Stock, 1973; Humes, 1990  |
| <b>Plexauridae</b>                                     |                                                                                     |     |        |                              |                                  |
| <i>Echinogorgia sassapo</i> (Esper, 1791)              | <i>Acanthomolgus arctatipes</i> Humes, 1974                                         | Rhy | MG     | 10; 13; 25                   | Humes, 1974                      |
| <i>Echinogorgia sassapo</i> (Esper, 1791)              | <i>Acanthomolgus combinatus</i> Humes, 1974                                         | Rhy | MG     | 10; 13; 25                   | Humes, 1974                      |
| <i>Echinogorgia</i> sp.                                | <i>Acanthomolgus combinatus</i> Humes, 1974                                         | Rhy | ID     | 10                           | Humes, 1993                      |
| <i>Eunicea calyculata</i> (Ellis, Solander, 1786)      | <i>Acanthomolgus verrucipes</i> Humes, 1973                                         | Rhy | BM     | 1                            | Humes, 1973                      |
| <i>Eunicea clavigera</i> Bayer, 1961                   | <i>Acanthomolgus mononyx</i> Stock, 1975                                            | Rhy | CW     | 22; 24; 33; 40; 41           | Stock, 1975c                     |
| <i>Eunicea flexuosa</i> (Lamouroux, 1821)              | <i>Acanthomolgus affinis</i> Stock, 1975                                            | Rhy | CW     | 2; 3                         | Stock, 1975c                     |
| <i>Eunicea flexuosa</i> (Lamouroux, 1821)              | <i>Acanthomolgus longidactylus</i> Stock, 1975                                      | Rhy | CW     | 3                            | Stock, 1975c                     |
| <i>Eunicea flexuosa</i> (Lamouroux, 1821)              | <i>Acanthomolgus muriceanus</i> Humes, 1973                                         | Rhy | GB     | 1; 2                         | Humes, 1973a                     |
| <i>Eunicea laciniata</i> Duchassaing, Michelotti, 1860 | <i>Acanthomolgus intermedius</i> Stock, 1975                                        | Rhy | CW     | 6                            | Stock, 1975c                     |
| <i>Eunicea mammosa</i> Lamouroux, 1816                 | <i>Enalcyonium euniceae</i> Stock, 1973                                             | Lam | PR     | 3                            | Stock, 1973                      |
| <i>Eunicea mammosa</i> Lamouroux, 1816                 | <i>Orecturus antillensis</i> Varela, 2011                                           | Ast | CU     | 3                            | Varela, 2011b                    |
| <i>Eunicea tourneforti</i> Milne Edwards, Haime, 1857  | <i>Acanthomolgus longifurca</i> Stock, 1975                                         | Rhy | CW     | 3                            | Stock, 1975c                     |

|                                                                                   |                                                                                                   |     |        |            |                                                            |
|-----------------------------------------------------------------------------------|---------------------------------------------------------------------------------------------------|-----|--------|------------|------------------------------------------------------------|
| <i>Muricea atlantica</i> (Kükenthal, 1911)                                        | <i>Acanthomolgus muriceanus</i> Humes, 1973                                                       | Rhy | BM     | 3          | Humes, 1973; Stock, 1975c                                  |
| <i>Muricea californica</i> Aurivillius, 1931                                      | <i>Acanthomolgus eminulus</i> Humes, Lewbel, 1977                                                 | Rhy | US     | 20         | Humes, Lewbel, 1977                                        |
| <i>Muricea laxa</i> Verrill, 1864                                                 | <i>Acanthomolgus aequisetula</i> Stock, 1975                                                      | Rhy | CW     | 34; 41     | Stock, 1975c                                               |
| <i>Muricea</i> sp.                                                                | <i>Acanthomolgus intermedius</i> Stock, 1975                                                      | Rhy | CU     |            | Varela et al., 2003                                        |
| <i>Paramuricea clavata</i> (Risso, 1826)                                          | <i>Doridicola botulosus</i> (Stock, Kleeton, 1963)                                                | Rhy | ES     | 20; 23     | Stock, Kleeton, 1963a                                      |
| <i>Paramuricea clavata</i> (Risso, 1826)                                          | <i>Doridicola comai</i> Conradi, Megina, López-González, 2004                                     | Rhy | ES; GB | 20; 25; 30 | Conradi, Megina, López-González, 2004                      |
| <i>Paramuricea clavata</i> (Risso, 1826) (= <i>Muricea chamaeleon</i> Koch, 1882) | <i>Enalcyonium setigerum</i> (Zulueta, 1908)                                                      | Lam | ES;FR  | 40; 200    | Bouligand, Delamare Deboutteville, 1959a; Bouligand, 1960b |
| <i>Paramuricea clavata</i> (Risso, 1826) (= <i>Muricea chamaeleon</i> Koch, 1882) | <i>Lamippula parva</i> (Zulueta, 1908) (= <i>Lamippe parva</i> Zulueta, 1908)                     | Lam | ES; FR |            | Zulueta, 1908; Bouligand, Delamare Deboutteville, 1959a    |
| <i>Paramuricea clavata</i> (Risso, 1826) (= <i>Muricea chamaeleon</i> Koch, 1882) | <i>Linaresia mammillifera</i> Zulueta, 1908                                                       | Lam | ES; FR |            | Bouligand, Delamare Deboutteville, 1959a; Zulueta, 1908    |
| <i>Placogorgia</i> sp.                                                            | <i>Linaresia bouligandi</i> Stock, 1979                                                           | Lam | US     | 73; 78     | Stock, 1979                                                |
| <i>Placogorgia</i> sp.                                                            | <i>Linaresia magna</i> Grygier, 1980                                                              | Lam | US     | 366        | Grygier, 1980                                              |
| <i>Plexaura homomalla</i> (Esper, 1794)                                           | <i>Acanthomolgus affinis</i> Stock, 1975                                                          | Rhy | CW     | 3          | Stock, 1975c                                               |
| <i>Plexaura homomalla</i> (Esper, 1794)                                           | <i>Enalcyonium nudum</i> Stock, 1973                                                              | Lam | PR     | 3          | Stock, 1973                                                |
| <i>Plexaura homomalla</i> (Esper, 1794)                                           | <i>Enalcyonium ramosum</i> Stock, 1973                                                            | Lam | PR     | 3          | Stock, 1973                                                |
| <i>Plexaura</i> sp.                                                               | <i>Acanthomolgus affinis</i> Stock, 1975                                                          | Rhy | CU     |            | Varela, 2011a                                              |
| <i>Plexaurella dichotoma</i> (Esper, 1791)                                        | <i>Acanthomolgus seticornis</i> Stock, 1975                                                       | Rhy | MF     | 3          | Stock, 1975c                                               |
| <i>Plexaurella nutans</i> (Duchassaing, Michelotti, 1860)                         | <i>Enalcyonium</i> sp.                                                                            | Lam | CU     | 20         | Varela et al., 2005b                                       |
| <i>Psammogorgia ramosa</i> Kükenthal                                              | <i>Doridicola cinctus</i> (Humes, Stock, 1973) (= <i>Metaxymolgus cinctus</i> Humes, Stock, 1973) | Rhy | MG     | 2; 12; 15  | Humes, Stock, 1973; Humes, 1974                            |
| <i>Pseudoplexaura porosa</i> (Houttuyn, 1772)                                     | <i>Acanthomolgus bayeri</i> Humes, 1973                                                           | Rhy | BM; GB | 1; 3       | Humes, 1973; Humes, 1973a                                  |
| <i>Pseudoplexaura</i> sp.                                                         | <i>Acanthomolgus bayeri</i> Humes, 1973                                                           | Rhy | CU     |            | Varela et al., 2003                                        |
| <i>Swiftia rosea</i> (Grieg, 1887)                                                | <i>Lamippella faurei</i> Bouligand, Delamare Deboutteville, 1959                                  | Lam | SE     | 40         | Bresciani, Lutzen, 1962                                    |

|                                                   |                                                                                                    |     |        |                    |                                 |
|---------------------------------------------------|----------------------------------------------------------------------------------------------------|-----|--------|--------------------|---------------------------------|
| <i>Thesea citrina</i> Deichmann, 1936             | <i>Magnippe caputmedusae</i> Stock, 1978                                                           | Lam | US     | 54.9; 73.2         | Stock, 1978                     |
| <i>Thesea rugosa</i> Deichmann, 1936              | <i>Magnippe caputmedusae</i> Stock, 1978                                                           | Lam | US     | 54.9               | Stock, 1978                     |
| <i>Villogorgia intricata</i> (Gray, 1870)         | <i>Acanthomolgus astrictus</i> Humes, Stock, 1973                                                  | Rhy | PH     | 30                 | Humes, 1993                     |
| <i>Villogorgia intricata</i> (Gray, 1870)         | <i>Forhanian philippinensis</i> Humes, 1990                                                        | Thm | PH     | 30                 | Humes, 1993                     |
| <i>Villogorgia intricata</i> (Gray, 1870)         | <i>Orecturus finitimus</i> Humes, 1993                                                             | Ast | PH     | 30                 | Humes, 1993                     |
| <i>Villogorgia intricata</i> (Gray, 1870)         | <i>Parasteropontius latus</i> (Humes, 1992) (= <i>Asteropontius latus</i> Humes, 1992)             | Ast | PH     | 30                 | Humes, 1993                     |
| <i>Villogorgia intricata</i> (Gray, 1870)         | <i>Thamnomolgus nodulus</i> Humes, 1990                                                            | Thm | PH     | 30                 | Humes, 1993                     |
| <i>Callogorgia</i> sp.                            | <i>Sphaerippe caligicola</i> Grygier, 1980                                                         | Lam | BS     | 366                | Grygier, 1980                   |
| <i>Primnoa resedaeformis</i> (Gunnerus, 1763)     | <i>Enalcyonium olssoni</i> (Zulueta, 1908)                                                         | Lam | US     | 334; 367; 432; 476 | Buhl-Mortensen, Mortensen, 2004 |
| <b>Subergorgiidae</b>                             |                                                                                                    |     |        |                    |                                 |
| <i>Annella reticulata</i> (Ellis, Solander, 1786) | <i>Forhanian philippinensis</i> Humes, 1990                                                        | Thm | PH     | 30                 | Humes, 1990a                    |
| <i>Annella reticulata</i> (Ellis, Solander, 1786) | <i>Paramolgus dapsilis</i> Humes, 1993                                                             | Rhy | ID; PH | 10; 30             | Humes, 1993                     |
| <i>Annella reticulata</i> (Ellis, Solander, 1786) | <i>Telestacicola angoti</i> Humes, Stock, 1973                                                     | Rhy | MG     | 8; 17              | Humes, 1974                     |
| <b>Tubiporidae</b>                                |                                                                                                    |     |        |                    |                                 |
| <i>Tubipora musica</i> Linnaeus, 1758             | <i>Asterocheres nudicoxus</i> Kim, 2010                                                            | Ast | MG     | 1                  | Kim, 2010                       |
| <i>Tubipora musica</i> Linnaeus, 1758             | <i>Asterocheres tubiporae</i> Kim, 2004                                                            | Ast | MG     | 1                  | Kim, 2004a                      |
| <i>Tubipora musica</i> Linnaeus, 1758             | <i>Entomopsyllus stocki</i> Kim, 2004                                                              | Ent |        |                    | Kim, 2004a                      |
| <i>Tubipora musica</i> Linnaeus, 1758             | <i>Eupolymniphilus brevicaudatus</i> Kim, 2009                                                     | Sab | MG     | 1                  | Kim, 2009                       |
| <i>Tubipora musica</i> Linnaeus, 1758             | <i>Hippomolgus cognatus</i> Humes, Ho, 1967                                                        | Cla | MG; YT | 1                  | Humes, Ho, 1967                 |
| <i>Tubipora musica</i> Linnaeus, 1758             | <i>Hippomolgus latipes</i> Humes, Ho, 1967                                                         | Cla | YT     | 1                  | Humes, Ho, 1967                 |
| <i>Tubipora musica</i> Linnaeus, 1758             | <i>Plesiomolgus conjunctus</i> (Humes, Ho, 1967) (= <i>Lichomolgus conjunctus</i> Humes, Ho, 1967) | Rhy | MG; YT | 15 cm; 1           | Humes, Ho, 1967                 |
| <i>Tubipora musica</i> Linnaeus, 1758             | <i>Plesiomolgus organicus</i> (Humes, Ho, 1967) (= <i>Lichomolgus organicus</i> Humes, Ho, 1967)   | Rhy | MG; YT | 15 cm; 1; 2        | Humes, Ho, 1967                 |
| <i>Tubipora musica</i> Linnaeus, 1758             | <i>Tubiporicola inflatus</i> Kim, 2009                                                             | Pse | MG     | 1                  | Kim, 2009                       |
| <b>Xeniidae</b>                                   |                                                                                                    |     |        |                    |                                 |

|                                                        |                                                                                                         |     |        |        |                                 |
|--------------------------------------------------------|---------------------------------------------------------------------------------------------------------|-----|--------|--------|---------------------------------|
| <i>Anthelia glauca</i> Lamarck, 1816                   | <i>Doridicola antheliae</i> (Humes, Stock, 1973) (= <i>Metaxymolgus antheliae</i> (Humes, Stock, 1973)) | Rhy | MG     | 8; 12  | Humes, Stock, 1973; Humes, 1990 |
| <i>Anthelia gracilis</i> (May, 1898)                   | <i>Paradoridicola triquetrus</i> (Humes, Ho, 1968) (= <i>Lichomolgus triquetrus</i> Humes, Ho, 1968)    | Rhy | MG     | 0,5    | Humes, Ho, 1968b                |
| <i>Anthelia ternatana</i> (Schenk, 1896)               | <i>Doridicola antheliae</i> (Humes, Stock, 1973) (= <i>Metaxymolgus antheliae</i> (Humes, Stock, 1973)) | Rhy | MG     | 18     | Humes, Stock, 1973              |
| <i>Caementabunda simplex</i> (Thomson, Dean, 1931)     | <i>Zamoligus tridens</i> Humes, Stock, 1973                                                             | Rhy | MG     |        | Humes, Stock, 1973              |
| <i>Cespitularia erecta</i> Macfadyen, 1936             | <i>Asterocheres indivisus</i> Kim, 2010                                                                 | Ast | MG     | 12; 24 | Kim, 2010                       |
| <i>Cespitularia multipinnata</i> (Quoy, Gaimard, 1833) | <i>Paramolgus extendens</i> Humes, Dojiri, 1979                                                         | Rhy | ID     | 5      | Humes, Dojiri, 1979c            |
| <i>Cespitularia multipinnata</i> (Quoy, Gaimard, 1833) | <i>Paramolgus pollicaris</i> Humes, Dojiri, 1979                                                        | Rhy | ID     | 5      | Humes, Dojiri, 1979c            |
| <i>Cespitularia multipinnata</i> (Quoy, Gaimard, 1833) | <i>Zamoligus cracens</i> Humes, Dojiri, 1979                                                            | Rhy | ID     | 5      | Humes, Dojiri, 1979c            |
| <i>Heteroxenia elisabethae</i> Kölliker, 1874          | <i>Acanthomolgus verseveldti</i> (Humes, Ho, 1968) (= <i>Lichomolgus verseveldti</i> (Humes, Ho, 1968)) | Rhy | MG; YT | 1      | Humes, Ho, 1968b                |
| <i>Heteroxenia fuscescens</i> (Ehrenberg, 1834)        | <i>Acanthomolgus verseveldti</i> (Humes, Ho, 1968)                                                      | Rhy | MG     | 20     | Humes, Stock, 1973              |
| <i>Heteroxenia</i> sp.                                 | <i>Doridicola petalopus</i> Humes, 1990                                                                 | Rhy | NC     | 0,5    | Humes, 1990                     |
| <i>Heteroxenia</i> sp.                                 | <i>Doridicola rostripes</i> Humes, 1990                                                                 | Rhy | NC     | 0,5    | Humes, 1990                     |
| <i>Heteroxenia</i> sp.                                 | <i>Paramolgus subincisus</i> Humes, 1990                                                                | Rhy | NC     |        | Humes, 1990                     |
| <i>Ovabunda macrospiculata</i> (Gohar, 1940)           | <i>Paradoridicola glabripes</i> (Humes, Ho, 1968)                                                       | Rhy | MG     | 20     | Humes, Stock, 1973              |
| <i>Xenia</i> Lamarck, 1816                             | <i>Doridicola petalopus</i> Humes, 1990                                                                 | Rhy | ID     | 3      | Humes, 1990                     |
| <i>Xenia</i> Lamarck, 1816                             | <i>Doridicola rostripes</i> Humes, 1990                                                                 | Rhy | ID     | 3      | Humes, 1990                     |
| <i>Xenia</i> Lamarck, 1816                             | <i>Paramolgus subincisus</i> Humes, 1990                                                                | Rhy | ID     | 3      | Humes, 1990                     |
| <i>Xenia lepida</i> Verseveldt, 1971                   | <i>Acanthomolgus verseveldti</i> (Humes, Ho, 1968)                                                      | Rhy | MG     | 10     | Humes, Stock, 1973              |
| <i>Xenia membranacea</i> Schenk, 1896                  | <i>Doridicola comparatus</i> (Humes, 1975) (= <i>Metaxymolgus comparatus</i> (Humes, 1975))             | Rhy | NC     | 15 cm  | Humes, 1975                     |

|                                                                             |                                                                                                                   |     |                |                              |                                                               |
|-----------------------------------------------------------------------------|-------------------------------------------------------------------------------------------------------------------|-----|----------------|------------------------------|---------------------------------------------------------------|
| <i>Xenia membranacea</i> Schenk, 1896                                       | <i>Doridicola praelongipes</i> (Humes, 1975) (= <i>Metaxymolgus praelongipes</i> (Humes, 1975))                   | Rhy | NC             | 15 cm                        | Humes, 1975                                                   |
| <i>Xenia membranacea</i> Schenk, 1896                                       | <i>Notoxynus mundus</i> Humes, 1975                                                                               | Rhy | NC             | 15 cm                        | Humes, 1975                                                   |
| <i>Xenia umbellata</i> Lamarck, 1816                                        | <i>Paradoridicola glabripes</i> (Humes, Ho, 1968)                                                                 | Rhy | MG             | 1                            | Humes, Ho, 1968c                                              |
| <i>Xenia viridis</i> Schenk, 1896                                           | <i>Doridicola praelongipes</i> (Humes, 1975)                                                                      | Rhy | ID             | 3                            | Humes, 1990                                                   |
| <i>Xenia viridis</i> Schenk, 1896                                           | <i>Paradoridicola glabripes</i> (Humes, Ho, 1968)                                                                 | Rhy | MG             |                              | Humes, Stock, 1973                                            |
| <b>Helioporacea</b>                                                         |                                                                                                                   |     |                |                              |                                                               |
| <b>Helioporidae</b>                                                         |                                                                                                                   |     |                |                              |                                                               |
| <i>Heliopora coerulea</i> (Pallas, 1766)                                    | <i>Entomopsyllus takara</i> Uyeno, Johnsson, 2018                                                                 | Ent | JP             | 10                           | Uyeno, Johnsson, 2018                                         |
| <b>Pennatulacea</b>                                                         |                                                                                                                   |     |                |                              |                                                               |
| <b>Anthoptilidae</b>                                                        |                                                                                                                   |     |                |                              |                                                               |
| <i>Anthoptilum grandiflorum</i> (Verrill, 1879)                             | <i>Lamippe bouligandi</i> Laubier, 1972                                                                           | Lam | CA; GL; IS     | 90; 98; 136; 600; 1210; 1347 | Laubier, 1972; Baillon, Hamel, Mercier, 2014                  |
| <b>Kophobelelemnidae</b>                                                    |                                                                                                                   |     |                |                              |                                                               |
| <i>Kophobelemon stelliferum</i> (Müller, 1776)                              | <i>Lamippella delamarei</i> Bouligand, 1965                                                                       | Lam | FR             |                              | Bouligand, 1965                                               |
| <b>Pennatulidae</b>                                                         |                                                                                                                   |     |                |                              |                                                               |
| <i>Pennatula phosphorea</i> Linnaeus, 1758                                  | <i>Lamippe rubra</i> Bruzelius, 1858                                                                              | Lam | FR: NO; SE; FR |                              | Bruzelius, 1858; Olsson, 1869; Zulueta, 1908; Bouligand, 1965 |
| <i>Pennatula phosphorea</i> Linnaeus, 1758                                  | <i>Lamippula chattoni</i> (Zulueta, 1908) (= <i>Enalcyonium chattoni</i> ; <i>Lamippe chattoni</i> Zulueta, 1908) | Lam | FR             |                              | Zulueta, 1908; Bouligand, 1965                                |
| <i>Pennatula rubra</i> (Ellis, 1761)                                        | <i>Enalcyonium rubicundum</i> Olsson, 1869                                                                        | Lam | SE             |                              | Olsson, 1869                                                  |
| <i>Pteroeides esperi</i> Herklots, 1858                                     | <i>Pennatulicola serratipes</i> (Ummerkutty, 1962)                                                                | Rhy |                |                              | Ummerkutty, 1961                                              |
| <i>Pteroeides griseum</i> (Bohadsch, 1761) (= <i>Pteroides spinulosus</i> ) | <i>Pennatulicola pteroidis</i> (Della Valle, 1880) (= <i>Lichomolgus pteroidis</i> Della Valle, 1880)             | Rhy |                |                              | Della Valle 1880                                              |
| <i>Pteroeides griseum</i> (Linnaeus, 1767)                                  | <i>Enalcyonium albidum</i> (Zulueta, 1908) (= <i>Lamippe albida</i> Zulueta, 1908)                                | Lam | FR             |                              | Zulueta, 1908; Bouligand, 1965                                |
| <i>Pteroeides griseum</i> (Linnaeus, 1767)                                  | <i>Enalcyonium kohsiangi</i> Uyeno, 2015                                                                          | Lam | SG             | 10,3; 10,6                   | Uyeno, 2015                                                   |

|                                             |                                                                                            |     |    |                                |                                             |
|---------------------------------------------|--------------------------------------------------------------------------------------------|-----|----|--------------------------------|---------------------------------------------|
| <i>Pteroeides griseum</i> (Linnaeus, 1767)  | <i>Lamippe pteroidis</i> Zulueta, 1910                                                     | Lam | FR |                                | Zulueta, 1910                               |
| <i>Pteroeides griseum</i> (Linnaeus, 1767)  | <i>Lamippula pallida</i> (Zulueta, 1908)                                                   | Lam |    |                                | Bouligand, Delamare<br>Deboutteville, 1959b |
| <i>Pteroeides oblongum</i> Gray, 1860       | <i>Critomolgus pteropadus</i> (Humes, 1978) (= <i>Doridicola pteropadus</i> Humes, 1978)   | Rhy | MG | 17                             | Humes, 1978                                 |
| <i>Pteroeides sagamiense</i> Moroff, 1902   | <i>Pennatulicola pterophilus</i> (Stock, 1962)                                             | Rhy | MG | 18                             | Humes, 1978                                 |
| <i>Pteroeides</i> sp.                       | <i>Pennatulicola piscatorius</i> Itoh, Kim, 2015                                           | Rhy | JP | 15                             | Itoh, Kim, 2015                             |
| <i>Pteroeides</i> sp.                       | <i>Pennatulicola pterophilus</i> (Stock, 1962)                                             | Rhy | ID |                                | Stock, 1962                                 |
| <i>Pteroeides</i> sp.                       | <i>Pennatulicola robustclavus</i> Uyeno, 2015                                              | Rhy | SG | 0; 6,2,<br>10,3;<br>10,6; 12,9 | Uyeno, 2015                                 |
| <i>Ptilosarcus gurneyi</i> (Gray, 1860)     | <i>Ptilosarcoma athyrmata</i> Williams, Anchaluisa, Boyko, McDaniel, 2018                  | Lam | CA | 5; 10                          | Williams et al., 2018                       |
| <b>Renillidae</b>                           |                                                                                            |     |    |                                |                                             |
| <i>Renilla reniformis</i> (Pallas, 1766)    | <i>Macrochiron sargassi</i> Sars G.O., 1916                                                | Mac | MF | 1                              | Humes, Stock, 1973                          |
| <b>Veretillidae</b>                         |                                                                                            |     |    |                                |                                             |
| <i>Veretillum cynomorium</i> (Pallas, 1766) | <i>Lamippula pallida</i> (Zulueta, 1908) (= <i>Lamippe pallida</i> Zulueta, 1908)          | Lam | FR |                                | Zulueta, 1908;<br>Bouligand, 1965           |
| <b>Virgulariidae</b>                        |                                                                                            |     |    |                                |                                             |
| <i>Virgularia juncea</i> (Pallas, 1766)     | <i>Critomolgus virgulariae</i> (Humes, 1978) (= <i>Doridicola virgulariae</i> Humes, 1978) | Rhy | MG | 17; 18; 34                     | Humes, 1978                                 |
| <i>Virgularia schultzei</i> Kükenthal, 1910 | <i>Enalcyonium concinnum</i> (Humes, 1957) (= <i>Lamippe concinna</i> Humes, 1957)         | Lam | SL | 5                              | Humes, 1957                                 |
|                                             | <i>Acanthomolgus bandaensis</i> Kim, 2007                                                  | Rhy | ID | 25                             | Kim, 2007                                   |
|                                             | <i>Caribeopsyllus chawayi</i> Suárez-Morales, In: Suárez-Morales, Castellanos, 1998        | Thp | MX | 1.5                            | Suárez-Morales,<br>Castellanos, 1988        |

\*Copepod family: see Table A1.

\*\*Sites: AQ - Antarctica, BB - Barbados, BM - Bermuda, BQ - Bonaire, St. Eustatius and Saba, BS - Bahamas, CA - Canada, CU - Cuba, CW - Curacao, ER - Eritrea, ES - Spain, FR - France, GB - Great Britain, GL - Greenland, ID -

Indonesia, IE - Ireland, IL - Israel, IS - Iceland, IT - Italy, JM - Jamaica, JP - Japan, KR - Republic of Korea, MF - Saint Martin (Fr.), MG - Madagascar, MH - Marshall Islands, NC - New Caledonia, NL-BQ3 - Sint Eustatius, NO - Norway, PH - Philippines, PR - Puerto Rico, RU - Russia, SE - Sweden, SG - Singapore, SL - Sierra Leone, US - USA, YT - Mayotte.
